# Supplementary material for: Anti-CarP antibodies in two large cohorts of patients with rheumatoid arthritis and their relationship to genetic risk factors, cigarette smoking and other autoantibodies
Source: HighWire-hosted journal article supplement (doi:10.1136/annrheumdis-2013-205109), 2014-05-09
Supplement: annrheumdis-2013-205109supp.pdf [file annrheumdis-2013-205109supp.pdf]

**Supplementary Table 1a.** RA risk in different subgroups divided by the presence/absence of CarP-Fib and CCP antibodies, in subjects exposed to different HLA alleles compared with non-exposed subjects. EIRA

| Antibody           | SE Positive stratum |                |         |             |                  |              | SE Negative stratum |                |         |             |                  |                   | Overall        |                |         |             |                  |                   |
|--------------------|---------------------|----------------|---------|-------------|------------------|--------------|---------------------|----------------|---------|-------------|------------------|-------------------|----------------|----------------|---------|-------------|------------------|-------------------|
|                    | Negative N (%)      | Positive N (%) | N total | OR*         | 95%CI            | p-value      | Negative N (%)      | Positive N (%) | N total | OR*         | 95%CI            | p-value           | Negative N (%) | Positive N (%) | N total | OR*         | 95%CI            | p-value           |
| <b>Any DRB1*01</b> |                     |                |         |             |                  |              |                     |                |         |             |                  |                   |                |                |         |             |                  |                   |
| Controls           | NA                  | NA             | NA      | NA          | NA               | NA           | NA                  | NA             | NA      | NA          | NA               | NA                | 791(81.05)     | 185(18.95)     | 976     | 1.00        | ref.             | -                 |
| CCP-/CarP-Fib-     | NA                  | NA             | NA      | NA          | NA               | NA           | NA                  | NA             | NA      | NA          | NA               | NA                | 363(77.56)     | 105(22.44)     | 468     | 1.25        | 0.95-1.65        | 0.12              |
| CCP-/CarP-Fib+     | NA                  | NA             | NA      | NA          | NA               | NA           | NA                  | NA             | NA      | NA          | NA               | NA                | 46(76.67)      | 14(23.33)      | 60      | 1.34        | 0.71-2.54        | 0.36              |
| CCP+/CarP-Fib-     | NA                  | NA             | NA      | NA          | NA               | NA           | NA                  | NA             | NA      | NA          | NA               | NA                | 266(75.14)     | 88(24.86)      | 354     | <b>1.50</b> | <b>1.12-2.02</b> | <b>0.0069</b>     |
| CCP+/CarP-Fib+     | NA                  | NA             | NA      | NA          | NA               | NA           | NA                  | NA             | NA      | NA          | NA               | NA                | 338(72.53)     | 128(27.47)     | 466     | <b>1.67</b> | <b>1.28-2.18</b> | <b>0.0001</b>     |
| <b>Any DRB1*03</b> |                     |                |         |             |                  |              |                     |                |         |             |                  |                   |                |                |         |             |                  |                   |
| Controls           | 318(83.03)          | 65(16.97)      | 383     | 1.0         | ref.             | -            | 338(67.20)          | 165(32.80)     | 503     | 1.0         | ref.             | -                 | 746(76.43)     | 230(23.57)     | 976     | 1.0         | ref.             | -                 |
| CCP-/CarP-Fib-     | 165(77.46)          | 48(22.54)      | 213     | 1.48        | 0.96-2.29        | 0.077        | 127(59.07)          | 88(40.93)      | 215     | 1.37        | 0.97-1.93        | 0.074             | 332(70.94)     | 136(29.06)     | 468     | <b>1.30</b> | <b>1.01-1.68</b> | <b>0.042</b>      |
| CCP-/CarP-Fib+     | 19(73.08)           | 7(26.92)       | 26      | 1.27        | 0.48-3.38        | 0.63         | 16(64.00)           | 9(36.00)       | 25      | 1.21        | 0.51-2.88        | 0.67              | 44(73.33)      | 16(26.67)      | 60      | 1.09        | 0.60-1.99        | 0.79              |
| CCP+/CarP-Fib-     | 148(75.13)          | 49(24.87)      | 197     | <b>1.65</b> | <b>1.07-2.55</b> | <b>0.024</b> | 36(55.38)           | 29(44.62)      | 65      | <b>1.74</b> | <b>1.01-3.01</b> | <b>0.046</b>      | 276(77.97)     | 78(22.03)      | 354     | 0.91        | 0.67-1.22        | 0.51              |
| CCP+/CarP-Fib+     | 205(86.13)          | 33(13.87)      | 238     | 0.90        | 0.56-1.44        | 0.65         | 47(74.60)           | 16(25.40)      | 63      | 0.68        | 0.36-1.27        | 0.22              | 417(89.48)     | 49(10.52)      | 466     | <b>0.38</b> | <b>0.27-0.54</b> | <b>&lt;0.0001</b> |
| <b>Any DRB1*04</b> |                     |                |         |             |                  |              |                     |                |         |             |                  |                   |                |                |         |             |                  |                   |
| Controls           | NA                  | NA             | NA      | NA          | NA               | NA           | NA                  | NA             | NA      | NA          | NA               | NA                | 635(65.06)     | 341(34.94)     | 976     | 1.0         | ref.             | -                 |
| CCP-/CarP-Fib-     | NA                  | NA             | NA      | NA          | NA               | NA           | NA                  | NA             | NA      | NA          | NA               | NA                | 300(64.10)     | 168(35.90)     | 468     | 1.04        | 0.82-1.31        | 0.77              |
| CCP-/CarP-Fib+     | NA                  | NA             | NA      | NA          | NA               | NA           | NA                  | NA             | NA      | NA          | NA               | NA                | 40(66.67)      | 20(33.33)      | 60      | 0.87        | 0.49-1.53        | 0.63              |
| CCP+/CarP-Fib-     | NA                  | NA             | NA      | NA          | NA               | NA           | NA                  | NA             | NA      | NA          | NA               | NA                | 123(34.75)     | 231(65.25)     | 354     | <b>3.59</b> | <b>2.76-4.66</b> | <b>&lt;0.0001</b> |
| CCP+/CarP-Fib+     | NA                  | NA             | NA      | NA          | NA               | NA           | NA                  | NA             | NA      | NA          | NA               | NA                | 130(27.90)     | 336(72.10)     | 466     | <b>5.11</b> | <b>3.99-6.55</b> | <b>&lt;0.0001</b> |
| <b>Any DRB1*07</b> |                     |                |         |             |                  |              |                     |                |         |             |                  |                   |                |                |         |             |                  |                   |
| Controls           | 337(87.99)          | 46(12.01)      | 383     | 1.0         | ref.             | -            | 392(77.93)          | 111(22.07)     | 503     | 1.0         | ref.             | -                 | 819(83.91)     | 157(16.09)     | 976     | 1.0         | ref.             | -                 |
| CCP-/CarP-Fib-     | 196(92.02)          | 17(7.98)       | 213     | 0.68        | 0.37-1.25        | 0.22         | 183(85.12)          | 32(14.88)      | 215     | <b>0.58</b> | <b>0.37-0.91</b> | <b>&lt;0.0001</b> | 419(89.53)     | 49(10.47)      | 468     | <b>0.60</b> | <b>0.43-0.85</b> | <b>0.0044</b>     |
| CCP-/CarP-Fib+     | 25(96.15)           | 1(3.85)        | 26      | 0.30        | 0.04-2.36        | 0.25         | 20(80.00)           | 5(20.00)       | 25      | 0.91        | 0.32-2.57        | 0.86              | 54(90.00)      | 6(10.00)       | 60      | 0.59        | 0.25-1.42        | 0.24              |
| CCP+/CarP-Fib-     | 183(92.89)          | 14(7.11)       | 197     | <b>0.48</b> | <b>0.25-0.91</b> | <b>0.02</b>  | 54(83.03)           | 11(16.92)      | 65      | 0.70        | 0.35-1.43        | 0.33              | 329(92.94)     | 25(7.06)       | 354     | <b>0.39</b> | <b>0.25-0.61</b> | <b>&lt;0.0001</b> |
| CCP+/CarP-Fib+     | 209(87.82)          | 29(12.18)      | 238     | 1.00        | 0.60-1.68        | 0.99         | 46(73.02)           | 17(26.98)      | 63      | 1.28        | 0.69-2.37        | 0.44              | 420(90.13)     | 46(9.87)       | 466     | <b>0.58</b> | <b>0.41-0.82</b> | <b>0.0023</b>     |
| <b>Any DRB1*08</b> |                     |                |         |             |                  |              |                     |                |         |             |                  |                   |                |                |         |             |                  |                   |
| Controls           | 359(93.73)          | 24(6.27)       | 383     | 1.0         | ref.             | -            | 438(87.08)          | 65(12.92)      | 503     | 1.0         | ref.             | -                 | 887(90.88)     | 89(9.12)       | 976     | 1.0         | ref.             | -                 |
| CCP-/CarP-Fib-     | 188(88.26)          | 25(11.74)      | 213     | <b>2.04</b> | <b>1.10-3.76</b> | <b>0.02</b>  | 179(83.26)          | 36(16.74)      | 215     | 1.45        | 0.92-2.29        | 0.11              | 407(86.97)     | 61(13.03)      | 468     | <b>1.54</b> | <b>1.08-2.19</b> | <b>0.017</b>      |
| CCP-/CarP-Fib+     | 23(88.46)           | 3(11.54)       | 26      | 2.50        | 0.60-10.47       | 0.21         | 22(88.00)           | 3(12.00)       | 25      | 0.94        | 0.27-3.30        | 0.92              | 54(90.00)      | 6(10.00)       | 60      | 1.16        | 0.48-2.81        | 0.75              |
| CCP+/CarP-Fib-     | 185(93.91)          | 12(6.09)       | 197     | 1.03        | 0.49-2.17        | 0.93         | 58(89.23)           | 7(10.77)       | 65      | 0.79        | 0.34-1.85        | 0.58              | 334(94.35)     | 20(5.65)       | 354     | <b>0.58</b> | <b>0.35-0.96</b> | <b>0.04</b>       |
| CCP+/CarP-Fib+     | 223(93.70)          | 15(6.30)       | 238     | 0.91        | 0.46-1.83        | 0.80         | 55(87.30)           | 8(12.70)       | 63      | 1.00        | 0.44-2.24        | 0.99              | 443(95.06)     | 23(4.94)       | 466     | <b>0.48</b> | <b>0.30-0.78</b> | <b>0.0028</b>     |
| <b>Any DRB1*09</b> |                     |                |         |             |                  |              |                     |                |         |             |                  |                   |                |                |         |             |                  |                   |
| Controls           | 373(97.39)          | 10(2.61)       | 383     | 1.0         | ref.             | -            | 481(95.63)          | 22(4.37)       | 503     | 1.0         | ref.             | -                 | 944(96.72)     | 32(3.28)       | 976     | 1.0         | ref.             | -                 |
| CCP-/CarP-Fib-     | 207(97.18)          | 6(2.82)        | 213     | 0.93        | 0.32-2.71        | 0.90         | 208(96.74)          | 7(3.26)        | 215     | 0.80        | 0.33-1.93        | 0.62              | 455(97.22)     | 13(2.78)       | 468     | 0.84        | 0.43-1.64        | 0.61              |
| CCP-/CarP-Fib+     | 24(92.31)           | 2(7.69)        | 26      | 3.07        | 0.56-16.86       | 0.20         | 23(92.00)           | 2(8.00)        | 25      | 1.62        | 0.31-8.39        | 0.57              | 56(93.33)      | 4(6.67)        | 60      | 2.50        | 0.81-7.71        | 0.11              |
| CCP+/CarP-Fib-     | 191(96.95)          | 6(3.05)        | 197     | 1.19        | 0.42-3.36        | 0.75         | 60(92.31)           | 5(7.69)        | 65      | 1.72        | 0.59-5.02        | 0.32              | 343(96.89)     | 11(3.11)       | 354     | 0.92        | 0.45-1.87        | 0.82              |
| CCP+/CarP-Fib+     | 232(97.48)          | 6(2.52)        | 238     | 1.06        | 0.36-3.15        | 0.92         | 57(90.48)           | 6(9.52)        | 63      | 2.33        | 0.85-6.41        | 0.10              | 454(97.42)     | 12(2.58)       | 466     | 0.72        | 0.36-1.43        | 0.35              |
| <b>Any DRB1*10</b> |                     |                |         |             |                  |              |                     |                |         |             |                  |                   |                |                |         |             |                  |                   |
| Controls           | NA                  | NA             | NA      | NA          | NA               | NA           | NA                  | NA             | NA      | NA          | NA               | NA                | 956(97.95)     | 20(2.05)       | 976     | 1.0         | ref.             | -                 |
| CCP-/CarP-Fib-     | NA                  | NA             | NA      | NA          | NA               | NA           | NA                  | NA             | NA      | NA          | NA               | NA                | 459(98.08)     | 9(1.92)        | 468     | 0.94        | 0.41-2.12        | 0.88              |
| CCP-/CarP-Fib+     | NA                  | NA             | NA      | NA          | NA               | NA           | NA                  | NA             | NA      | NA          | NA               | NA                | 58(96.67)      | 2(3.33)        | 60      | 1.47        | 0.32-6.80        | 0.62              |
| CCP+/CarP-Fib-     | NA                  | NA             | NA      | NA          | NA               | NA           | NA                  | NA             | NA      | NA          | NA               | NA                | 345(97.46)     | 9(2.54)        | 354     | 1.12        | 0.50-2.52        | 0.79              |

| CCP+/CarP-Fib+     | NA         | NA        | NA  | NA          | NA                | NA            | NA         | NA         | NA  | NA          | NA                | NA     | 449(96.35) | 17(3.65)   | 466 | 1.69        | 0.87-3.28        | 0.12              |
|--------------------|------------|-----------|-----|-------------|-------------------|---------------|------------|------------|-----|-------------|-------------------|--------|------------|------------|-----|-------------|------------------|-------------------|
| <b>Any DRB1*11</b> |            |           |     |             |                   |               |            |            |     |             |                   |        |            |            |     |             |                  |                   |
| Controls           | 355(92.69) | 28(7.31)  | 383 | 1.0         | ref.              | -             | 428(85.09) | 75(14.91)  | 503 | 1.0         | ref.              | -      | 873(89.45) | 103(10.55) | 976 | 1.0         | ref.             | -                 |
| CCP-/CarP-Fib-     | 199(93.43) | 14(6.57)  | 213 | 0.98        | 0.50-1.94         | 0.96          | 181(84.19) | 34(15.81)  | 215 | 1.16        | 0.73-1.84         | 0.53   | 420(89.74) | 48(10.26)  | 468 | 1.04        | 0.72-1.50        | 0.85              |
| CCP-/CarP-Fib+     | 25(96.15)  | 1(3.85)   | 26  | 0.45        | 0.06-3.74         | 0.46          | 23(92.00)  | 2(8.00)    | 25  | 0.57        | 0.13-2.56         | 0.47   | 57(95.00)  | 3(5.00)    | 60  | 0.47        | 0.14-1.53        | 0.21              |
| CCP+/CarP-Fib-     | 179(90.86) | 18(9.14)  | 197 | 1.23        | 0.65-2.32         | 0.53          | 55(84.62)  | 10(15.38)  | 65  | 1.15        | 0.54-2.43         | 0.72   | 326(92.09) | 28(7.91)   | 354 | 0.73        | 0.47-1.14        | 0.16              |
| CCP+/CarP-Fib+     | 213(89.50) | 25(10.50) | 238 | 1.44        | 0.80-2.58         | 0.22          | 49(77.78)  | 14(22.22)  | 63  | 1.81        | 0.92-3.58         | 0.09   | 427(91.63) | 39(8.37)   | 466 | 0.77        | 0.52-1.14        | 0.18              |
| <b>Any DRB1*12</b> |            |           |     |             |                   |               |            |            |     |             |                   |        |            |            |     |             |                  |                   |
| Controls           | 369(96.34) | 14(3.66)  | 383 | 1.0         | ref.              | -             | 473(94.04) | 30(5.96)   | 503 | 1.0         | ref.              | -      | 932(95.49) | 44(4.51)   | 976 | 1.0         | ref.             | -                 |
| CCP-/CarP-Fib-     | 209(98.12) | 4(1.88)   | 213 | 0.45        | 0.14-1.41         | 0.17          | 201(93.49) | 14(6.51)   | 215 | 1.03        | 0.52-2.04         | 0.93   | 450(96.15) | 18(3.85)   | 468 | 0.79        | 0.45-1.40        | 0.42              |
| CCP-/CarP-Fib+     | 23(88.46)  | 3(11.54)  | 26  | 4.06        | 0.85-19.37        | 0.08          | 22(88.00)  | 3(12.00)   | 25  | 2.37        | 0.63-8.89         | 0.20   | 54(90.00)  | 6(10.00)   | 60  | <b>2.64</b> | <b>1.04-6.71</b> | <b>0.042</b>      |
| CCP+/CarP-Fib-     | 190(96.45) | 7(3.55)   | 197 | 0.89        | 0.34-2.31         | 0.81          | 60(92.31)  | 5(7.69)    | 65  | 1.18        | 0.42-3.33         | 0.75   | 342(96.61) | 12(3.39)   | 354 | 0.72        | 0.37-1.40        | 0.33              |
| CCP+/CarP-Fib+     | 226(94.96) | 12(5.04)  | 238 | 1.54        | 0.67-3.55         | 0.31          | 62(98.41)  | 1(1.59)    | 63  | 0.28        | 0.04-2.11         | 0.22   | 453(97.21) | 13(2.79)   | 466 | 0.61        | 0.32-1.15        | 0.13              |
| <b>Any DRB1*13</b> |            |           |     |             |                   |               |            |            |     |             |                   |        |            |            |     |             |                  |                   |
| Controls           | 289(75.46) | 94(24.54) | 383 | 1.0         | ref.              | -             | 331(65.81) | 172(34.19) | 503 | 1.0         | ref.              | -      | 710(72.75) | 266(27.25) | 976 | 1.0         | ref.             | -                 |
| CCP-/CarP-Fib-     | 170(79.81) | 43(20.19) | 213 | 0.76        | 0.50-1.16         | 0.21          | 132(61.40) | 83(38.60)  | 215 | 1.24        | 0.87-1.75         | 0.23   | 342(73.08) | 126(26.92) | 468 | 1.00        | 0.78-1.29        | 0.99              |
| CCP-/CarP-Fib+     | 24(92.31)  | 2(7.69)   | 26  | 0.26        | 0.06-1.19         | 0.08          | 15(60.00)  | 10(40.00)  | 25  | 1.30        | 0.55-3.06         | 0.56   | 48(80.00)  | 12(20.00)  | 60  | 0.68        | 0.35-1.32        | 0.26              |
| CCP+/CarP-Fib-     | 177(89.85) | 20(10.15) | 197 | <b>0.36</b> | <b>0.21-0.62</b>  | <b>0.0002</b> | 47(72.31)  | 18(27.69)  | 65  | 0.77        | 0.42-1.40         | 0.39   | 316(89.27) | 38(10.73)  | 354 | <b>0.33</b> | <b>0.23-0.47</b> | <b>&lt;0.0001</b> |
| CCP+/CarP-Fib+     | 206(86.55) | 32(13.45) | 238 | <b>0.47</b> | <b>0.30-0.74</b>  | <b>0.0012</b> | 51(80.95)  | 12(19.05)  | 63  | <b>0.41</b> | <b>0.21-0.80</b>  | 0.0095 | 422(90.56) | 44(9.44)   | 466 | <b>0.27</b> | <b>0.19-0.38</b> | <b>&lt;0.0001</b> |
| <b>Any DRB1*14</b> |            |           |     |             |                   |               |            |            |     |             |                   |        |            |            |     |             |                  |                   |
| Controls           | 378(98.69) | 5(1.31)   | 383 | 1.0         | ref.              | -             | 465(92.45) | 38(7.55)   | 503 | 1.0         | ref.              | -      | 933(95.59) | 43(4.41)   | 976 | 1.0         | ref.             | -                 |
| CCP-/CarP-Fib-     | 206(96.71) | 7(3.29)   | 213 | 2.93        | 0.90-9.61         | 0.08          | 198(92.09) | 17(7.91)   | 215 | 1.05        | 0.57-1.93         | 0.88   | 444(94.87) | 24(5.13)   | 468 | 1.23        | 0.73-2.07        | 0.44              |
| CCP-/CarP-Fib+     | 26(100)    | 0(0)      | 26  | NA          | NA                | NA            | 22(88.00)  | 3(12.00)   | 25  | 1.87        | 0.50-6.91         | 0.35   | 57(95.00)  | 3(5.00)    | 60  | 1.13        | 0.33-3.83        | 0.85              |
| CCP+/CarP-Fib-     | 189(95.94) | 8(4.06)   | 197 | <b>3.17</b> | <b>1.00-10.03</b> | <b>0.05</b>   | 62(95.38)  | 3(4.62)    | 65  | 0.48        | 0.14-1.67         | 0.25   | 343(96.89) | 11(3.11)   | 354 | 0.64        | 0.33-1.27        | 0.20              |
| CCP+/CarP-Fib+     | 234(98.32) | 4(1.68)   | 238 | 1.36        | 0.35-5.20         | 0.66          | 61(96.83)  | 2(3.17)    | 63  | 0.43        | 0.10-1.88         | 0.26   | 460(98.71) | 6(1.29)    | 466 | <b>0.27</b> | <b>0.12-0.65</b> | <b>0.0033</b>     |
| <b>Any DRB1*15</b> |            |           |     |             |                   |               |            |            |     |             |                   |        |            |            |     |             |                  |                   |
| Controls           | 295(77.02) | 88(22.98) | 383 | 1.0         | ref.              | -             | 312(62.03) | 191(37.97) | 503 | 1.0         | ref.              | -      | 697(71.41) | 279(28.59) | 976 | 1.0         | ref.             | -                 |
| CCP-/CarP-Fib-     | 173(81.22) | 40(18.78) | 213 | 0.74        | 0.48-1.14         | 0.17          | 145(67.44) | 70(32.56)  | 215 | 0.76        | 0.54-1.08         | 0.12   | 358(76.50) | 110(23.50) | 468 | <b>0.75</b> | <b>0.58-0.97</b> | <b>0.03</b>       |
| CCP-/CarP-Fib+     | 20(76.92)  | 6(23.08)  | 26  | 1.21        | 0.44-3.34         | 0.72          | 19(76.00)  | 6(24.00)   | 25  | 0.44        | 0.17-1.16         | 0.098  | 48(80.00)  | 12(20.00)  | 60  | 0.64        | 0.33-1.23        | 0.18              |
| CCP+/CarP-Fib-     | 142(72.08) | 55(27.92) | 197 | 1.32        | 0.89-1.98         | 0.17          | 37(56.92)  | 28(43.08)  | 65  | 1.22        | 0.71-2.09         | 0.48   | 271(76.55) | 83(23.45)  | 354 | 0.78        | 0.59-1.04        | 0.09              |
| CCP+/CarP-Fib+     | 172(72.27) | 66(27.73) | 238 | 1.24        | 0.85-1.83         | 0.27          | 34(53.97)  | 29(46.03)  | 63  | 1.38        | 0.80-2.37         | 0.25   | 371(79.61) | 95(20.39)  | 466 | <b>0.64</b> | <b>0.49-0.83</b> | 0.001             |
| <b>Any DRB1*16</b> |            |           |     |             |                   |               |            |            |     |             |                   |        |            |            |     |             |                  |                   |
| Controls           | 380(99.22) | 3(0.78)   | 383 | 1.0         | ref.              | -             | 493(98.01) | 10(1.99)   | 503 | 1.0         | ref.              | -      | 963(98.67) | 13(1.33)   | 976 | 1.0         | ref.             | -                 |
| CCP-/CarP-Fib-     | 211(99.06) | 2(0.94)   | 213 | 0.94        | 0.15-5.96         | 0.95          | 209(97.21) | 6(2.79)    | 215 | 1.52        | 0.53-4.38         | 0.44   | 460(98.29) | 8(1.71)    | 468 | 1.17        | 0.47-2.89        | 0.74              |
| CCP-/CarP-Fib+     | 26(100)    | 0(0)      | 26  | NA          | NA                | NA            | 25(100)    | 0(0)       | 25  | NA          | NA                | NA     | 60(100)    | 0(0)       | 60  | NA          | NA               | NA                |
| CCP+/CarP-Fib-     | 195(98.98) | 2(1.02)   | 197 | 0.90        | 0.14-5.68         | 0.91          | 62(95.38)  | 3(4.62)    | 65  | 2.47        | 0.58-10.47        | 0.22   | 349(98.59) | 5(1.41)    | 354 | 0.93        | 0.32-2.70        | 0.89              |
| CCP+/CarP-Fib+     | 233(97.90) | 5(2.10)   | 238 | 2.01        | 0.46-8.73         | 0.35          | 57(90.48)  | 6(9.52)    | 63  | <b>5.89</b> | <b>1.92-18.11</b> | 0.002  | 455(97.64) | 11(2.36)   | 466 | 1.75        | 0.77-3.99        | 0.18              |

\*: adjusted for age, gender and residential area

**Supplementary Table 1b.** RA risk in different subgroups divided by the presence/absence of CarP-FCS and CCP antibodies, in subjects exposed to different HLA alleles compared with non-exposed subjects. EIRA

| Antibody           | SE Positive stratum |                |         |             |                   |               | SE Negative stratum |                |         |             |                  |              | Overall        |                |         |             |                  |                   |
|--------------------|---------------------|----------------|---------|-------------|-------------------|---------------|---------------------|----------------|---------|-------------|------------------|--------------|----------------|----------------|---------|-------------|------------------|-------------------|
|                    | Negative N (%)      | Positive N (%) | N total | OR*         | 95%CI             | p-value       | Negative N (%)      | Positive N (%) | N total | OR*         | 95%CI            | p-value      | Negative N (%) | Positive N (%) | N total | OR*         | 95%CI            | p-value           |
| <b>Any DRB1*01</b> |                     |                |         |             |                   |               |                     |                |         |             |                  |              |                |                |         |             |                  |                   |
| Controls           | NA                  | NA             | NA      | NA          | NA                | NA            | NA                  | NA             | NA      | NA          | NA               | NA           | 791(81.05)     | 185(18.95)     | 976     | 1.0         | ref.             | -                 |
| CCP-/CarP-FCS-     | NA                  | NA             | NA      | NA          | NA                | NA            | NA                  | NA             | NA      | NA          | NA               | NA           | 359(76.55)     | 110(23.45)     | 469     | <b>1.32</b> | <b>1.01-1.74</b> | <b>0.046</b>      |
| CCP-/CarP-FCS+     | NA                  | NA             | NA      | NA          | NA                | NA            | NA                  | NA             | NA      | NA          | NA               | NA           | 50(84.75)      | 9(15.25)       | 59      | 0.80        | 0.38-1.67        | 0.55              |
| CCP+/CarP-FCS-     | NA                  | NA             | NA      | NA          | NA                | NA            | NA                  | NA             | NA      | NA          | NA               | NA           | 329(78.15)     | 92(21.85)      | 421     | 1.25        | 0.94-1.67        | 0.13              |
| CCP+/CarP-FCS+     | NA                  | NA             | NA      | NA          | NA                | NA            | NA                  | NA             | NA      | NA          | NA               | NA           | 275(68.92)     | 124(31.08)     | 399     | <b>2.00</b> | <b>1.53-2.63</b> | <0.0001           |
| <b>Any DRB1*03</b> |                     |                |         |             |                   |               |                     |                |         |             |                  |              |                |                |         |             |                  |                   |
| Controls           | 318(83.03)          | 65(16.97)      | 383     | 1.0         | ref.              | -             | 338(67.20)          | 165(32.80)     | 503     | 1.0         | ref.             | -            | 746(76.43)     | 230(23.57)     | 976     | 1.0         | ref.             | -                 |
| CCP-/CarP-FCS-     | 166(78.30)          | 46(21.70)      | 212     | 1.32        | 0.85-2.04         | 0.22          | 128(60.38)          | 84(39.62)      | 212     | 1.28        | 0.91-1.81        | 0.16         | 339(72.28)     | 130(27.72)     | 469     | 1.21        | 0.94-1.56        | 0.15              |
| CCP-/CarP-FCS+     | 18(66.67)           | 9(33.33)       | 27      | <b>2.69</b> | <b>1.07-6.72</b>  | <b>0.0346</b> | 15(53.57)           | 13(46.43)      | 28      | 1.95        | 0.88-4.35        | 0.10         | 37(62.71)      | 22(37.29)      | 59      | <b>1.87</b> | <b>1.07-3.27</b> | <b>0.0282</b>     |
| CCP+/CarP-FCS-     | 195(81.25)          | 45(18.75)      | 240     | 1.17        | 0.75-1.81         | 0.50          | 48(61.54)           | 30(38.46)      | 78      | 1.33        | 0.80-2.22        | 0.28         | 346(82.19)     | 75(17.81)      | 421     | <b>0.71</b> | <b>0.53-0.95</b> | <b>0.0223</b>     |
| CCP+/CarP-FCS+     | 158(81.03)          | 37(18.97)      | 195     | 1.31        | 0.82-2.09         | 0.26          | 35(70.00)           | 15(30.00)      | 50      | 0.84        | 0.43-1.63        | 0.60         | 347(86.97)     | 52(13.03)      | 399     | <b>0.48</b> | <b>0.35-0.67</b> | <b>&lt;0.0001</b> |
| <b>Any DRB1*04</b> |                     |                |         |             |                   |               |                     |                |         |             |                  |              |                |                |         |             |                  |                   |
| Controls           | NA                  | NA             | NA      | NA          | NA                | NA            | NA                  | NA             | NA      | NA          | NA               | NA           | 635(65.06)     | 341(34.94)     | 976     | 1.0         | ref.             | -                 |
| CCP-/CarP-FCS-     | NA                  | NA             | NA      | NA          | NA                | NA            | NA                  | NA             | NA      | NA          | NA               | NA           | 306(65.25)     | 163(34.75)     | 469     | 0.99        | 0.78-1.25        | 0.93              |
| CCP-/CarP-FCS+     | NA                  | NA             | NA      | NA          | NA                | NA            | NA                  | NA             | NA      | NA          | NA               | NA           | 34(57.63)      | 25(42.37)      | 59      | 1.28        | 0.74-2.20        | 0.38              |
| CCP+/CarP-FCS-     | NA                  | NA             | NA      | NA          | NA                | NA            | NA                  | NA             | NA      | NA          | NA               | NA           | 141(33.49)     | 280(66.51)     | 421     | <b>3.82</b> | <b>2.98-4.90</b> | <b>&lt;0.0001</b> |
| CCP+/CarP-FCS+     | NA                  | NA             | NA      | NA          | NA                | NA            | NA                  | NA             | NA      | NA          | NA               | NA           | 112(28.07)     | 287(71.93)     | 399     | <b>5.05</b> | <b>3.99-6.56</b> | <b>&lt;0.0001</b> |
| <b>Any DRB1*07</b> |                     |                |         |             |                   |               |                     |                |         |             |                  |              |                |                |         |             |                  |                   |
| Controls           | 337(87.99)          | 46(12.01)      | 383     | 1.0         | ref.              | -             | 392(77.93)          | 111(22.07)     | 503     | 1.0         | ref.             | -            | 819(83.91)     | 157(16.09)     | 976     | 1.0         | ref.             | -                 |
| CCP-/CarP-FCS-     | 196(92.45)          | 16(7.55)       | 212     | 0.66        | 0.36-1.23         | 0.19          | 180(84.91)          | 32(15.09)      | 212     | <b>0.58</b> | <b>0.37-0.92</b> | <b>0.02</b>  | 421(89.77)     | 48(10.23)      | 469     | <b>0.58</b> | <b>0.41-0.83</b> | <b>0.0026</b>     |
| CCP-/CarP-FCS+     | 25(92.59)           | 2(7.41)        | 27      | 0.52        | 0.11-2.37         | 0.40          | 23(82.14)           | 5(17.86)       | 28      | 0.85        | 0.31-2.35        | 0.75         | 52(88.14)      | 7(11.86)       | 59      | 0.74        | 0.33-1.68        | 0.47              |
| CCP+/CarP-FCS-     | 220(91.67)          | 20(8.33)       | 240     | 0.57        | 0.32-1.01         | 0.054         | 63(80.77)           | 15(19.23)      | 78      | 0.85        | 0.45-1.58        | 0.60         | 386(91.69)     | 35(8.31)       | 421     | <b>0.46</b> | <b>0.31-0.69</b> | <b>0.0001</b>     |
| CCP+/CarP-FCS+     | 172(88.21)          | 23(11.79)      | 195     | 0.96        | 0.56-1.67         | 0.90          | 37(74.00)           | 13(26.00)      | 50      | 1.17        | 0.58-2.34        | 0.66         | 363(90.98)     | 36(9.02)       | 399     | <b>0.52</b> | <b>0.35-0.77</b> | <b>0.0009</b>     |
| <b>Any DRB1*08</b> |                     |                |         |             |                   |               |                     |                |         |             |                  |              |                |                |         |             |                  |                   |
| Controls           | 359(93.73)          | 24(6.27)       | 383     | 1.0         | ref.              | -             | 438(87.08)          | 65(12.92)      | 503     | 1.0         | ref.             | -            | 887(90.88)     | 89(9.12)       | 976     | 1.0         | ref.             | -                 |
| CCP-/CarP-FCS-     | 189(89.15)          | 23(10.85)      | 212     | 1.85        | 0.99-3.47         | 0.054         | 178(83.96)          | 34(16.04)      | 212     | 1.38        | 0.87-2.21        | 0.17         | 412(87.85)     | 57(12.15)      | 469     | 1.41        | 0.99-2.03        | 0.060             |
| CCP-/CarP-FCS+     | 22(81.48)           | 5(18.52)       | 27      | <b>4.52</b> | <b>1.40-14.63</b> | <b>0.012</b>  | 23(82.14)           | 5(17.86)       | 28      | 1.64        | 0.58-4.63        | 0.35         | 49(83.05)      | 10(16.95)      | 59      | <b>2.13</b> | <b>1.03-4.42</b> | <b>0.0423</b>     |
| CCP+/CarP-FCS-     | 226(94.17)          | 14(5.83)       | 240     | 1.01        | 0.50-2.06         | 0.97          | 68(87.18)           | 10(12.82)      | 78      | 0.98        | 0.47-2.04        | 0.95         | 396(94.06)     | 25(5.94)       | 421     | <b>0.62</b> | <b>0.39-0.98</b> | <b>0.043</b>      |
| CCP+/CarP-FCS+     | 182(93.33)          | 13(6.67)       | 195     | 0.94        | 0.45-1.95         | 0.86          | 45(90.00)           | 5(10.00)       | 50      | 0.76        | 0.29-2.04        | 0.59         | 381(95.49)     | 18(4.51)       | 399     | <b>0.44</b> | <b>0.26-0.74</b> | <b>0.002</b>      |
| <b>Any DRB1*09</b> |                     |                |         |             |                   |               |                     |                |         |             |                  |              |                |                |         |             |                  |                   |
| Controls           | 373(97.36)          | 10(2.61)       | 383     | 1.0         | ref.              | -             | 481(95.63)          | 22(4.37)       | 503     | 1.0         | ref.             | -            | 944(96.72)     | 32(3.28)       | 976     | 1.0         | ref.             | -                 |
| CCP-/CarP-FCS-     | 204(96.23)          | 8(3.77)        | 212     | 1.39        | 0.51-3.80         | 0.52          | 205(96.70)          | 7(3.30)        | 212     | 0.80        | 0.33-1.94        | 0.62         | 454(96.80)     | 15(3.20)       | 469     | 0.99        | 0.53-1.88        | 0.98              |
| CCP-/CarP-FCS+     | 27(100)             | 0(0)           | 27      | NA          | NA                | NA            | 26(92.86)           | 2(7.14)        | 28      | 1.44        | 0.29-7.21        | 0.66         | 57(96.61)      | 2(3.39)        | 59      | 1.22        | 0.28-5.39        | 0.79              |
| CCP+/CarP-FCS-     | 232(96.67)          | 8(3.33)        | 240     | 1.38        | 0.52-3.68         | 0.52          | 73(93.59)           | 5(6.41)        | 78      | 1.40        | 0.49-4.02        | 0.53         | 408(96.91)     | 13(3.09)       | 421     | 0.87        | 0.44-1.70        | 0.68              |
| CCP+/CarP-FCS+     | 191(97.95)          | 4(2.05)        | 195     | 0.80        | 0.24-2.66         | 0.71          | 44(88.00)           | 6(12.00)       | 50      | <b>2.95</b> | <b>1.06-8.18</b> | <b>0.038</b> | 389(97.49)     | 10(2.51)       | 399     | 0.74        | 0.36-1.54        | 0.43              |
| <b>Any DRB1*10</b> |                     |                |         |             |                   |               |                     |                |         |             |                  |              |                |                |         |             |                  |                   |
| Controls           | NA                  | NA             | NA      | NA          | NA                | NA            | NA                  | NA             | NA      | NA          | NA               | NA           | 956(97.95)     | 20(2.05)       | 976     | 1.0         | ref.             | -                 |
| CCP-/CarP-FCS-     | NA                  | NA             | NA      | NA          | NA                | NA            | NA                  | NA             | NA      | NA          | NA               | NA           | 459(97.87)     | 10(2.13)       | 469     | 1.03        | 0.47-2.29        | 0.94              |
| CCP-/CarP-FCS+     | NA                  | NA             | NA      | NA          | NA                | NA            | NA                  | NA             | NA      | NA          | NA               | NA           | 58(98.31)      | 1(1.69)        | 59      | 0.67        | 0.09-5.32        | 0.71              |
| CCP+/CarP-FCS-     | NA                  | NA             | NA      | NA          | NA                | NA            | NA                  | NA             | NA      | NA          | NA               | NA           | 410(97.39)     | 11(2.61)       | 421     | 1.22        | 0.57-2.60        | 0.61              |
| CCP+/CarP-FCS+     | NA                  | NA             | NA      | NA          | NA                | NA            | NA                  | NA             | NA      | NA          | NA               | NA           | 384(96.24)     | 15(3.76)       | 399     | 1.78        | 0.90-3.54        | 0.10              |
| <b>Any DRB1*11</b> |                     |                |         |             |                   |               |                     |                |         |             |                  |              |                |                |         |             |                  |                   |
| Controls           | 355(92.69)          | 28(7.31)       | 383     | 1.0         | ref.              | -             | 428(85.09)          | 75(14.91)      | 503     | 1.0         | ref.             | -            | 873(89.45)     | 103(10.55)     | 976     | 1.0         | ref.             | -                 |
| CCP-/CarP-FCS-     | 200(94.34)          | 12(5.66)       | 212     | 0.82        | 0.40-1.67         | 0.58          | 180(84.91)          | 32(15.09)      | 212     | 1.11        | 0.69-1.77        | 0.67         | 425(90.62)     | 44(9.38)       | 469     | 0.93        | 0.64-1.36        | 0.70              |

|                    |            |           |     |             |                  |                   |            |            |     |             |                  |             |            |            |     |             |                  |                   |
|--------------------|------------|-----------|-----|-------------|------------------|-------------------|------------|------------|-----|-------------|------------------|-------------|------------|------------|-----|-------------|------------------|-------------------|
| CCP-/CarP-FCS+     | 24(88.89)  | 3(11.11)  | 27  | 1.94        | 0.51-7.35        | 0.33              | 24(85.71)  | 4(14.29)   | 28  | 0.92        | 0.30-2.85        | 0.88        | 52(88.14)  | 7(11.86)   | 59  | 1.24        | 0.54-2.86        | 0.61              |
| CCP+/CarP-FCS-     | 215(89.58) | 25(10.42) | 240 | 1.47        | 0.82-2.64        | 0.19              | 62(79.49)  | 16(20.51)  | 78  | 1.72        | 0.91-3.25        | 0.09        | 380(90.26) | 41(9.74)   | 421 | 0.93        | 0.63-1.37        | 0.71              |
| CCP+/CarP-FCS+     | 177(90.77) | 18(9.23)  | 195 | 1.20        | 0.63-2.27        | 0.58              | 42(84.00)  | 8(16.00)   | 50  | 1.14        | 0.50-2.62        | 0.76        | 373(93.48) | 26(6.52)   | 399 | <b>0.58</b> | <b>0.37-0.92</b> | <b>0.02</b>       |
| <b>Any DRB1*12</b> |            |           |     |             |                  |                   |            |            |     |             |                  |             |            |            |     |             |                  |                   |
| Controls           | 369(96.34) | 14(3.66)  | 383 | 1.0         | ref.             | -                 | 473(94.04) | 30(5.96)   | 503 | 1.0         | ref.             | -           | 932(95.49) | 44(4.51)   | 976 | 1.0         | ref.             | -                 |
| CCP-/CarP-FCS-     | 206(97.17) | 6(2.83)   | 212 | 0.64        | 0.24-1.76        | 0.39              | 197(92.92) | 15(7.08)   | 212 | 1.15        | 0.59-2.24        | 0.68        | 448(95.52) | 21(4.48)   | 469 | 0.92        | 0.53-1.60        | 0.77              |
| CCP-/CarP-FCS+     | 26(96.30)  | 1(3.70)   | 27  | 1.17        | 0.13-10.32       | 0.89              | 26(92.86)  | 2(7.14)    | 28  | 1.37        | 0.30-6.29        | 0.68        | 56(94.92)  | 3(5.08)    | 59  | 1.22        | 0.36-4.13        | 0.75              |
| CCP+/CarP-FCS-     | 233(97.08) | 7(2.92)   | 240 | 0.77        | 0.29-2.00        | 0.58              | 74(94.87)  | 4(5.13)    | 78  | 0.78        | 0.25-2.37        | 0.66        | 410(97.39) | 11(2.61)   | 421 | 0.54        | 0.27-1.07        | 0.08              |
| CCP+/CarP-FCS+     | 183(93.85) | 12(6.15)  | 195 | 1.85        | 0.81-4.22        | 0.15              | 48(96.00)  | 2(4.00)    | 50  | 0.72        | 0.16-3.22        | 0.67        | 385(96.49) | 14(3.51)   | 399 | 0.79        | 0.43-1.47        | 0.46              |
| <b>Any DRB1*13</b> |            |           |     |             |                  |                   |            |            |     |             |                  |             |            |            |     |             |                  |                   |
| Controls           | 289(75.46) | 94(24.54) | 383 | 1.0         | ref.             | -                 | 331(65.81) | 172(34.19) | 503 | 1.0         | ref.             | -           | 710(72.75) | 266(27.25) | 976 | 1.0         | ref.             | -                 |
| CCP-/CarP-FCS-     | 168(79.25) | 44(20.75) | 212 | 0.79        | 0.52-1.21        | 0.28              | 129(60.85) | 83(39.15)  | 212 | 1.29        | 0.91-1.83        | 0.15        | 342(72.92) | 127(27.08) | 469 | 1.02        | 0.79-1.31        | 0.89              |
| CCP-/CarP-FCS+     | 26(96.30)  | 1(3.70)   | 27  | <b>0.12</b> | <b>0.02-0.89</b> | <b>0.04</b>       | 18(64.29)  | 10(35.71)  | 28  | 0.96        | 0.42-2.19        | 0.91        | 48(81.36)  | 11(18.64)  | 59  | 0.59        | 0.30-1.16        | 0.12              |
| CCP+/CarP-FCS-     | 208(86.67) | 32(13.33) | 240 | <b>0.49</b> | <b>0.31-0.77</b> | <b>0.002</b>      | 60(76.92)  | 18(23.08)  | 78  | <b>0.55</b> | <b>0.31-0.98</b> | <b>0.04</b> | 371(88.12) | 50(11.88)  | 421 | <b>0.36</b> | <b>0.26-0.50</b> | <b>&lt;0.0001</b> |
| CCP+/CarP-FCS+     | 175(89.74) | 20(10.26) | 195 | <b>0.34</b> | <b>0.20-0.58</b> | <b>&lt;0.0001</b> | 38(76.00)  | 12(24.00)  | 50  | 0.59        | 0.29-1.19        | 0.14        | 367(91.98) | 32(8.02)   | 399 | <b>0.23</b> | <b>0.16-0.34</b> | <b>&lt;0.0001</b> |
| <b>Any DRB1*14</b> |            |           |     |             |                  |                   |            |            |     |             |                  |             |            |            |     |             |                  |                   |
| Controls           | 378(98.69) | 5(1.31)   | 383 | 1.0         | ref.             | -                 | 465(92.45) | 38(7.55)   | 504 | 1.0         | ref.             | -           | 933(95.59) | 43(4.41)   | 976 | 1.0         | ref.             | -                 |
| CCP-/CarP-FCS-     | 205(96.70) | 7(3.30)   | 212 | 2.88        | 0.88-9.44        | 0.08              | 196(92.45) | 16(7.55)   | 212 | 1.02        | 0.54-1.91        | 0.96        | 446(95.10) | 23(4.90)   | 469 | 1.17        | 0.69-1.99        | 0.56              |
| CCP-/CarP-FCS+     | 27(100)    | 0(0)      | 27  | NA          | NA               | NA                | 24(85.71)  | 4(14.29)   | 28  | 1.85        | 0.58-5.89        | 0.30        | 55(93.22)  | 4(6.78)    | 59  | 1.52        | 0.51-4.47        | 0.45              |
| CCP+/CarP-FCS-     | 231(96.25) | 9(3.75)   | 240 | <b>3.19</b> | <b>1.03-9.90</b> | <b>0.05</b>       | 74(94.87)  | 4(5.13)    | 78  | 0.58        | 0.19-1.72        | 0.32        | 408(96.91) | 13(3.09)   | 421 | 0.65        | 0.35-1.24        | 0.19              |
| CCP+/CarP-FCS+     | 192(98.46) | 3(1.54)   | 195 | 1.35        | 0.31-5.85        | 0.69              | 49(98.00)  | 1(2.00)    | 50  | 0.26        | 0.03-1.96        | 0.19        | 395(99.00) | 4(1.00)    | 399 | <b>0.21</b> | <b>0.08-0.60</b> | <b>0.0036</b>     |
| <b>Any DRB1*15</b> |            |           |     |             |                  |                   |            |            |     |             |                  |             |            |            |     |             |                  |                   |
| Controls           | 295(77.02) | 88(22.98) | 383 | 1.0         | ref.             | -                 | 312(62.03) | 191(37.97) | 503 | 1.0         | ref.             | -           | 697(71.41) | 279(28.59) | 976 | 1.0         | ref.             | -                 |
| CCP-/CarP-FCS-     | 171(80.66) | 41(19.34) | 212 | 0.80        | 0.52-1.23        | 0.31              | 143(67.45) | 69(32.55)  | 212 | 0.74        | 0.52-1.06        | 0.10        | 359(76.55) | 110(23.45) | 469 | <b>0.75</b> | <b>0.58-0.97</b> | <b>0.031</b>      |
| CCP-/CarP-FCS+     | 22(81.48)  | 5(18.52)  | 27  | 0.65        | 0.23-1.84        | 0.41              | 21(75.00)  | 7(25.00)   | 28  | 0.56        | 0.23-1.35        | 0.19        | 47(79.66)  | 12(20.34)  | 59  | 0.64        | 0.33-1.23        | 0.18              |
| CCP+/CarP-FCS-     | 173(72.08) | 67(27.92) | 240 | 1.28        | 0.87-1.88        | 0.21              | 44(56.41)  | 34(43.59)  | 78  | 1.25        | 0.76-2.06        | 0.38        | 320(76.01) | 101(23.99) | 421 | 0.80        | 0.61-1.04        | 0.10              |
| CCP+/CarP-FCS+     | 141(72.31) | 54(27.69) | 195 | 1.28        | 0.86-1.93        | 0.23              | 27(54.00)  | 23(46.00)  | 50  | 1.43        | 0.78-2.61        | 0.25        | 322(80.70) | 77(19.30)  | 399 | <b>0.59</b> | <b>0.45-0.79</b> | 0.0004            |
| <b>Any DRB1*16</b> |            |           |     |             |                  |                   |            |            |     |             |                  |             |            |            |     |             |                  |                   |
| Controls           | 380(99.22) | 3(0.78)   | 383 | 1.0         | ref.             | -                 | 493(98.01) | 10(1.99)   | 503 | 1.0         | ref.             | -           | 963(98.67) | 13(1.33)   | 976 | 1.0         | ref.             | -                 |
| CCP-/CarP-FCS-     | 210(99.06) | 2(0.94)   | 212 | 0.96        | 0.15-6.17        | 0.97              | 206(97.17) | 6(2.83)    | 212 | 1.46        | 0.51-4.21        | 0.48        | 461(98.29) | 8(1.71)    | 469 | 1.14        | 0.46-2.82        | 0.78              |
| CCP-/CarP-FCS+     | 27(100)    | 0(0)      | 27  | NA          | NA               | NA                | 28(100)    | 0(0)       | 28  | NA          | NA               | NA          | 59(100)    | 0(0)       | 59  | NA          | NA               | NA                |
| CCP+/CarP-FCS-     | 237(98.75) | 3(1.25)   | 240 | 1.19        | 0.22-6.29        | 0.84              | 72(92.31)  | 6(7.69)    | 78  | 5.14        | 1.67-15.85       | 0.0043      | 412(97.86) | 9(2.14)    | 421 | 1.54        | 0.64-3.72        | 0.34              |
| CCP+/CarP-FCS+     | 191(97.95) | 4(2.05)   | 195 | 1.87        | 0.40-8.84        | 0.43              | 47(94.00)  | 3(6.00)    | 50  | 2.74        | 0.67-11.24       | 0.16        | 392(98.25) | 7(1.75)    | 399 | 1.27        | 0.50-3.26        | 0.62              |

\*: adjusted for age, gender and residential area

**Supplementary Table 2a.** RA risk in different subgroups divided by the presence/absence of CarP-Fib and CCP antibodies, in subjects exposed to different HLA alleles compared with non-exposed subjects. Netherlands

| Antibody           | SE Positive stratum |                |         |             |                   |              | SE Negative stratum |                |         |             |                   |              | Overall        |                |         |             |                  |              |
|--------------------|---------------------|----------------|---------|-------------|-------------------|--------------|---------------------|----------------|---------|-------------|-------------------|--------------|----------------|----------------|---------|-------------|------------------|--------------|
|                    | Negative N (%)      | Positive N (%) | N total | OR          | 95%CI             | p-value      | Negative N (%)      | Positive N (%) | N total | OR          | 95%CI             | p-value      | Negative N (%) | Positive N (%) | N total | OR          | 95%CI            | p-value      |
| <b>Any DRB1*01</b> |                     |                |         |             |                   |              |                     |                |         |             |                   |              |                |                |         |             |                  |              |
| Controls           | NA                  | NA             | NA      | NA          | NA                | NA           | NA                  | NA             | NA      | NA          | NA                | NA           | 948 (78.3)     | 263 (21.7)     | 1211    | 1.00        | ref.             | -            |
| CCP-/CarP-Fib-     | NA                  | NA             | NA      | NA          | NA                | NA           | NA                  | NA             | NA      | NA          | NA                | NA           | 233 (73.5)     | 84 (26.5)      | 317     | 1.30        | 0.98-1.73        | 0.07         |
| CCP-/CarP-Fib+     | NA                  | NA             | NA      | NA          | NA                | NA           | NA                  | NA             | NA      | NA          | NA                | NA           | 24 (82.8)      | 5 (17.2)       | 29      | 0.75        | 0.28-1.99        | 0.56         |
| CCP+/CarP-Fib-     | NA                  | NA             | NA      | NA          | NA                | NA           | NA                  | NA             | NA      | NA          | NA                | NA           | 104 (78.8)     | 28 (21.2)      | 132     | 0.97        | 0.63-1.51        | 0.89         |
| CCP+/CarP-Fib+     | NA                  | NA             | NA      | NA          | NA                | NA           | NA                  | NA             | NA      | NA          | NA                | NA           | 184 (71.6)     | 73 (28.4)      | 257     | <b>1.43</b> | <b>1.06-1.94</b> | <b>0.02</b>  |
| <b>Any DRB1*03</b> |                     |                |         |             |                   |              |                     |                |         |             |                   |              |                |                |         |             |                  |              |
| Controls           | 385 (83.7)          | 75 (16.3)      | 460     | 1.0         | ref.              | -            | 480 (71.2)          | 194 (28.8)     | 674     | 1.0         | ref.              | -            | 941 (77.7)     | 270 (22.3)     | 1211    | 1.0         | ref.             | -            |
| CCP-/CarP-Fib-     | 96 (77.4)           | 28 (22.6)      | 124     | 1.50        | 0.92-2.44         | 0.11         | 95 (56.5)           | 73 (43.5)      | 168     | <b>1.90</b> | <b>1.34-2.69</b>  | <b>0.000</b> | 215 (67.8)     | 102 (32.2)     | 317     | <b>1.65</b> | <b>1.26-2.17</b> | <b>0.000</b> |
| CCP-/CarP-Fib+     | 8 (50.0)            | 8 (50.0)       | 16      | <b>5.13</b> | <b>1.87-14.10</b> | <b>0.002</b> | 7 (58.3)            | 5 (41.7)       | 12      | 1.77        | 0.55-5.64         | 0.34         | 16 (55.2)      | 13 (44.8)      | 29      | <b>2.83</b> | <b>1.35-5.96</b> | <b>0.006</b> |
| CCP+/CarP-Fib-     | 53 (76.8)           | 16 (23.2)      | 69      | 1.55        | 0.84-2.86         | 0.16         | 24 (68.6)           | 11 (31.4)      | 35      | 1.13        | 0.55-2.36         | 0.74         | 105 (79.5)     | 27 (20.5)      | 132     | 0.90        | 0.58-1.40        | 0.63         |
| CCP+/CarP-Fib+     | 119 (81.0)          | 28 (19.0)      | 147     | 1.21        | 0.75-1.95         | 0.44         | 31 (70.5)           | 13 (29.5)      | 44      | 1.04        | 0.53-2.03         | 0.91         | 216 (84.0)     | 41 (16.0)      | 257     | <b>0.66</b> | <b>0.46-0.95</b> | <b>0.03</b>  |
| <b>Any DRB1*04</b> |                     |                |         |             |                   |              |                     |                |         |             |                   |              |                |                |         |             |                  |              |
| Controls           | NA                  | NA             | NA      | NA          | NA                | NA           | NA                  | NA             | NA      | NA          | NA                | NA           | 875 (72.3)     | 336 (27.7)     | 1211    | 1.0         | ref.             | -            |
| CCP-/CarP-Fib-     | NA                  | NA             | NA      | NA          | NA                | NA           | NA                  | NA             | NA      | NA          | NA                | NA           | 232 (73.2)     | 85 (26.8)      | 317     | 0.95        | 0.72-1.26        | 0.74         |
| CCP-/CarP-Fib+     | NA                  | NA             | NA      | NA          | NA                | NA           | NA                  | NA             | NA      | NA          | NA                | NA           | 15 (51.7)      | 14 (48.3)      | 29      | <b>2.43</b> | <b>1.16-5.09</b> | <b>0.02</b>  |
| CCP+/CarP-Fib-     | NA                  | NA             | NA      | NA          | NA                | NA           | NA                  | NA             | NA      | NA          | NA                | NA           | 61 (46.2)      | 71 (53.8)      | 132     | <b>3.03</b> | <b>2.11-4.36</b> | <b>0.000</b> |
| CCP+/CarP-Fib+     | NA                  | NA             | NA      | NA          | NA                | NA           | NA                  | NA             | NA      | NA          | NA                | NA           | 109 (42.4)     | 148 (57.6)     | 257     | <b>3.54</b> | <b>2.68-4.67</b> | <b>0.000</b> |
| <b>Any DRB1*07</b> |                     |                |         |             |                   |              |                     |                |         |             |                   |              |                |                |         |             |                  |              |
| Controls           | 395 (85.9)          | 65 (14.1)      | 460     | 1.0         | ref.              | -            | 502 (74.5)          | 172 (25.5)     | 674     | 1.0         | ref.              | -            | 973 (80.3)     | 238 (19.7)     | 1211    | 1.0         | ref.             | -            |
| CCP-/CarP-Fib-     | 111 (89.5)          | 13 (10.5)      | 124     | 0.71        | 0.38-1.34         | 0.29         | 128 (76.2)          | 40 (23.8)      | 168     | 0.91        | 0.61-1.35         | 0.65         | 264 (83.3)     | 53 (16.7)      | 317     | 0.82        | 0.59-1.14        | 0.24         |
| CCP-/CarP-Fib+     | 15 (93.8)           | 1 (6.2)        | 16      | 0.41        | 0.05-3.12         | 0.39         | 10 (83.3)           | 2 (16.7)       | 12      | 0.58        | 0.13-2.69         | 0.49         | 26 (89.7)      | 3 (10.3)       | 29      | 0.47        | 0.14-1.57        | 0.22         |
| CCP+/CarP-Fib-     | 62 (89.9)           | 7 (10.1)       | 69      | 0.69        | 0.30-1.57         | 0.37         | 26 (74.3)           | 9 (25.7)       | 35      | 1.01        | 0.46-2.20         | 0.98         | 116 (87.9)     | 16 (12.1)      | 132     | <b>0.56</b> | <b>0.33-0.97</b> | <b>0.04</b>  |
| CCP+/CarP-Fib+     | 125 (85.0)          | 22 (15.0)      | 147     | 1.07        | 0.63-1.81         | 0.80         | 32 (72.7)           | 12 (27.3)      | 44      | 1.09        | 0.55-2.17         | 0.80         | 223 (86.8)     | 34 (13.2)      | 257     | <b>0.62</b> | <b>0.42-0.92</b> | <b>0.02</b>  |
| <b>Any DRB1*08</b> |                     |                |         |             |                   |              |                     |                |         |             |                   |              |                |                |         |             |                  |              |
| Controls           | 435 (94.6)          | 25 (5.4)       | 460     | 1.0         | ref.              | -            | 611 (90.7)          | 63 (9.3)       | 674     | 1.0         | ref.              | -            | 1123 (92.7)    | 88 (7.3)       | 1211    | 1.0         | ref.             | -            |
| CCP-/CarP-Fib-     | 122 (98.4)          | 2 (1.6)        | 124     | 0.29        | 0.07-1.22         | 0.09         | 162 (96.4)          | 6 (3.6)        | 168     | <b>0.36</b> | <b>0.15-0.85</b>  | <b>0.02</b>  | 309 (97.5)     | 8 (2.5)        | 317     | <b>0.33</b> | <b>0.16-0.69</b> | <b>0.003</b> |
| CCP-/CarP-Fib+     | 15 (93.8)           | 1 (6.2)        | 16      | 1.16        | 0.15-9.14         | 0.89         | 11 (91.7)           | 1 (8.3)        | 12      | 0.88        | 0.11-6.94         | 0.91         | 27 (93.1)      | 2 (6.9)        | 29      | 0.95        | 0.22-4.04        | 0.94         |
| CCP+/CarP-Fib-     | 65 (94.2)           | 4 (5.8)        | 69      | 1.07        | 0.36-3.18         | 0.90         | 33 (94.3)           | 2 (5.7)        | 35      | 0.59        | 0.14-2.51         | 0.47         | 126 (95.5)     | 6 (4.5)        | 132     | 0.61        | 0.26-1.42        | 0.25         |
| CCP+/CarP-Fib+     | 144 (98.0)          | 3 (2.0)        | 147     | 0.36        | 0.11-1.22         | 0.10         | 42 (95.5)           | 2 (4.5)        | 44      | 0.46        | 0.11-1.95         | 0.29         | 252 (98.1)     | 5 (1.9)        | 257     | <b>0.25</b> | <b>0.10-0.63</b> | <b>0.003</b> |
| <b>Any DRB1*09</b> |                     |                |         |             |                   |              |                     |                |         |             |                   |              |                |                |         |             |                  |              |
| Controls           | 454 (98.7)          | 6 (1.3)        | 460     | 1.0         | ref.              | -            | 652 (96.7)          | 22 (3.3)       | 674     | 1.0         | ref.              | -            | 1183 (97.7)    | 28 (2.3)       | 1211    | 1.0         | ref.             | -            |
| CCP-/CarP-Fib-     | 121 (97.6)          | 3 (2.4)        | 124     | 1.88        | 0.46-7.61         | 0.38         | 161 (95.8)          | 7 (4.2)        | 168     | 1.29        | 0.54-3.07         | 0.57         | 307 (96.8)     | 10 (3.2)       | 317     | 1.38        | 0.66-2.86        | 0.39         |
| CCP-/CarP-Fib+     | 16 (100.0)          | 0 (0.0)        | 16      | NA          | NA                | NA           | 12 (100.0)          | 0 (0.0)        | 12      | NA          | NA                | NA           | 29 (100.0)     | 0 (0.0)        | 29      | NA          | NA               | NA           |
| CCP+/CarP-Fib-     | 68 (98.6)           | 1 (1.4)        | 69      | 1.11        | 0.13-9.39         | 0.92         | 32 (91.4)           | 3 (8.6)        | 35      | 2.78        | 0.79-9.77         | 0.11         | 128 (97.0)     | 4 (3.0)        | 132     | 1.32        | 0.46-3.82        | 0.61         |
| CCP+/CarP-Fib+     | 139 (94.6)          | 8 (5.4)        | 147     | <b>4.36</b> | <b>1.49-12.77</b> | <b>0.007</b> | 38 (86.4)           | 6 (13.6)       | 44      | <b>4.68</b> | <b>1.79-12.22</b> | <b>0.002</b> | 242 (94.2)     | 15 (5.8)       | 257     | <b>2.62</b> | <b>1.38-4.98</b> | <b>0.003</b> |
| <b>Any DRB1*10</b> |                     |                |         |             |                   |              |                     |                |         |             |                   |              |                |                |         |             |                  |              |
| Controls           | NA                  | NA             | NA      | NA          | NA                | NA           | NA                  | NA             | NA      | NA          | NA                | NA           | 1180 (97.4)    | 31 (2.6)       | 1211    | 1.0         | ref.             | -            |
| CCP-/CarP-Fib-     | NA                  | NA             | NA      | NA          | NA                | NA           | NA                  | NA             | NA      | NA          | NA                | NA           | 313 (98.7)     | 4 (1.3)        | 317     | 0.49        | 0.17-1.39        | 0.18         |
| CCP-/CarP-Fib+     | NA                  | NA             | NA      | NA          | NA                | NA           | NA                  | NA             | NA      | NA          | NA                | NA           | 29 (100.0)     | 0 (0.0)        | 29      | NA          | NA               | NA           |
| CCP+/CarP-Fib-     | NA                  | NA             | NA      | NA          | NA                | NA           | NA                  | NA             | NA      | NA          | NA                | NA           | 120 (90.9)     | 12 (9.1)       | 132     | <b>3.81</b> | <b>1.91-7.61</b> | <b>0.000</b> |
| CCP+/CarP-Fib+     | NA                  | NA             | NA      | NA          | NA                | NA           | NA                  | NA             | NA      | NA          | NA                | NA           | 230 (89.5)     | 27 (10.5)      | 257     | <b>4.47</b> | <b>2.62-7.63</b> | <b>0.000</b> |
| <b>Any DRB1*11</b> |                     |                |         |             |                   |              |                     |                |         |             |                   |              |                |                |         |             |                  |              |

|                    |            |           |     |             |                  |              |            |            |     |      |            |      |             |            |      |             |                  |              |
|--------------------|------------|-----------|-----|-------------|------------------|--------------|------------|------------|-----|------|------------|------|-------------|------------|------|-------------|------------------|--------------|
| Controls           | 390 (84.8) | 70 (15.2) | 460 | 1.0         | ref.             | -            | 532 (78.9) | 142 (21.1) | 674 | 1.0  | ref.       | -    | 999 (82.5)  | 212 (17.5) | 1211 | 1.0         | ref.             | -            |
| CCP-/CarP-Fib-     | 111 (89.5) | 13 (10.5) | 124 | 0.65        | 0.35-1.22        | 0.18         | 126 (75.0) | 42 (25.0)  | 168 | 1.25 | 0.84-1.85  | 0.27 | 262 (82.6)  | 55 (17.4)  | 317  | 0.99        | 0.71-1.37        | 0.95         |
| CCP-/CarP-Fib+     | 14 (87.5)  | 2 (12.5)  | 16  | 0.80        | 0.18-3.58        | 0.77         | 10 (83.3)  | 2 (16.7)   | 12  | 0.75 | 0.16-3.46  | 0.71 | 25 (86.2)   | 4 (13.8)   | 29   | 0.75        | 0.26-2.19        | 0.60         |
| CCP+/CarP-Fib-     | 63 (91.3)  | 6 (8.7)   | 69  | 0.53        | 0.22-1.27        | 0.16         | 24 (68.6)  | 11 (31.4)  | 35  | 1.72 | 0.82-3.59  | 0.15 | 115 (87.1)  | 17 (12.9)  | 132  | 0.70        | 0.41-1.18        | 0.18         |
| CCP+/CarP-Fib+     | 128 (87.1) | 19 (12.9) | 147 | 0.83        | 0.48-1.43        | 0.49         | 36 (81.8)  | 8 (18.2)   | 44  | 0.83 | 0.38-1.83  | 0.65 | 230 (89.5)  | 27 (10.5)  | 257  | <b>0.55</b> | <b>0.36-0.85</b> | <b>0.006</b> |
| <b>Any DRB1*12</b> |            |           |     |             |                  |              |            |            |     |      |            |      |             |            |      |             |                  |              |
| Controls           | 444 (96.5) | 16 (3.5)  | 460 | 1.0         | ref.             | -            | 634 (94.1) | 40 (5.9)   | 674 | 1.0  | ref.       | -    | 1154 (95.3) | 57 (4.7)   | 1211 | 1.0         | ref.             | -            |
| CCP-/CarP-Fib-     | 120 (96.8) | 4 (3.2)   | 124 | 0.93        | 0.30-2.82        | 0.89         | 154 (91.7) | 14 (8.3)   | 168 | 1.44 | 0.77-2.72  | 0.26 | 299 (94.3)  | 18 (5.7)   | 317  | 1.22        | 0.71-2.10        | 0.48         |
| CCP-/CarP-Fib+     | 16 (100.0) | 0 (0.0)   | 16  | NA          | NA               | NA           | 11 (91.7)  | 1 (8.3)    | 12  | 1.44 | 0.18-11.44 | 0.73 | 28 (96.6)   | 1 (3.4)    | 29   | 0.72        | 0.10-5.41        | 0.75         |
| CCP+/CarP-Fib-     | 68 (98.6)  | 1 (1.4)   | 69  | 0.41        | 0.05-3.13        | 0.39         | 34 (97.1)  | 1 (2.9)    | 35  | 0.47 | 0.06-3.49  | 0.46 | 130 (98.5)  | 2 (1.5)    | 132  | 0.31        | 0.08-1.29        | 0.11         |
| CCP+/CarP-Fib+     | 143 (97.3) | 4 (2.7)   | 147 | 0.78        | 0.26-2.36        | 0.66         | 41 (93.2)  | 3 (6.8)    | 44  | 1.16 | 0.34-3.91  | 0.81 | 250 (97.3)  | 7 (2.7)    | 257  | 0.57        | 0.26-1.26        | 0.16         |
| <b>Any DRB1*13</b> |            |           |     |             |                  |              |            |            |     |      |            |      |             |            |      |             |                  |              |
| Controls           | 372 (80.9) | 88 (19.1) | 460 | 1.0         | ref.             | -            | 442 (65.6) | 232 (34.4) | 674 | 1.0  | ref.       | -    | 891 (73.6)  | 320 (26.4) | 1211 | 1.0         | ref.             | -            |
| CCP-/CarP-Fib-     | 100 (80.6) | 24 (19.4) | 124 | 1.02        | 0.61-1.68        | 0.96         | 113 (67.3) | 55 (32.7)  | 168 | 0.93 | 0.65-1.33  | 0.68 | 237 (74.8)  | 80 (25.2)  | 317  | 0.94        | 0.71-1.25        | 0.67         |
| CCP-/CarP-Fib+     | 14 (87.5)  | 2 (12.5)  | 16  | 0.60        | 0.14-2.71        | 0.51         | 10 (83.3)  | 2 (16.7)   | 12  | 0.38 | 0.08-1.75  | 0.22 | 25 (86.2)   | 4 (13.8)   | 29   | 0.45        | 0.15-1.29        | 0.14         |
| CCP+/CarP-Fib-     | 63 (91.3)  | 6 (8.7)   | 69  | <b>0.40</b> | <b>0.17-0.96</b> | <b>0.04</b>  | 24 (68.6)  | 11 (31.4)  | 35  | 0.87 | 0.42-1.81  | 0.87 | 115 (87.1)  | 17 (12.9)  | 132  | <b>0.41</b> | <b>0.24-0.70</b> | <b>0.001</b> |
| CCP+/CarP-Fib+     | 132 (89.8) | 15 (10.2) | 147 | <b>0.48</b> | <b>0.27-0.86</b> | <b>0.014</b> | 35 (79.5)  | 9 (20.5)   | 44  | 0.49 | 0.23-1.04  | 0.06 | 232 (90.3)  | 25 (9.7)   | 257  | <b>0.30</b> | <b>0.20-0.46</b> | <b>0.000</b> |
| <b>Any DRB1*14</b> |            |           |     |             |                  |              |            |            |     |      |            |      |             |            |      |             |                  |              |
| Controls           | 438 (95.2) | 22 (4.8)  | 460 | 1.0         | ref.             | -            | 613 (90.9) | 61 (9.1)   | 674 | 1.0  | ref.       | -    | 1128 (93.1) | 83 (6.9)   | 1211 | 1.0         | ref.             | -            |
| CCP-/CarP-Fib-     | 117 (94.4) | 7 (5.6)   | 124 | 1.19        | 0.50-2.86        | 0.70         | 159 (94.6) | 9 (5.4)    | 168 | 0.57 | 0.28-1.17  | 0.13 | 301 (95.0)  | 16 (5.0)   | 317  | 0.72        | 0.42-1.25        | 0.25         |
| CCP-/CarP-Fib+     | 16 (100.0) | 0 (0.0)   | 16  | NA          | NA               | NA           | 10 (83.3)  | 2 (16.7)   | 12  | 2.01 | 0.43-9.38  | 0.38 | 27 (93.1)   | 2 (6.9)    | 29   | 1.01        | 0.24-4.31        | 0.99         |
| CCP+/CarP-Fib-     | 66 (95.7)  | 3 (4.3)   | 69  | 0.91        | 0.26-3.11        | 0.87         | 32 (91.4)  | 3 (8.6)    | 35  | 0.94 | 0.28-3.17  | 0.92 | 126 (95.5)  | 6 (4.5)    | 132  | 0.65        | 0.28-1.51        | 0.32         |
| CCP+/CarP-Fib+     | 140 (95.2) | 7 (4.8)   | 147 | 1.00        | 0.42-2.38        | 0.99         | 43 (97.7)  | 1 (2.3)    | 44  | 0.23 | 0.03-1.73  | 0.15 | 249 (96.9)  | 8 (3.1)    | 257  | <b>0.44</b> | <b>0.21-0.91</b> | <b>0.03</b>  |
| <b>Any DRB1*15</b> |            |           |     |             |                  |              |            |            |     |      |            |      |             |            |      |             |                  |              |
| Controls           | 381 (82.8) | 79 (17.2) | 460 | 1.0         | ref.             | -            | 424 (62.9) | 250 (37.1) | 674 | 1.0  | ref.       | -    | 882 (72.8)  | 329 (27.2) | 1211 | 1.0         | ref.             | -            |
| CCP-/CarP-Fib-     | 98 (79.0)  | 26 (21.0) | 124 | 1.28        | 0.78-2.10        | 0.33         | 119 (70.8) | 49 (29.2)  | 168 | 0.70 | 0.48-1.01  | 0.06 | 242 (76.3)  | 75 (23.7)  | 317  | 0.83        | 0.62-1.11        | 0.21         |
| CCP-/CarP-Fib+     | 15 (93.8)  | 1 (6.2)   | 16  | 0.32        | 0.04-2.47        | 0.28         | 5 (41.7)   | 7 (58.3)   | 12  | 2.37 | 0.75-7.56  | 0.14 | 21 (72.4)   | 8 (27.6)   | 29   | 1.02        | 0.45-2.33        | 0.96         |
| CCP+/CarP-Fib-     | 48 (69.6)  | 21 (30.4) | 69  | <b>2.11</b> | <b>1.20-3.72</b> | <b>0.01</b>  | 25 (71.4)  | 10 (28.6)  | 35  | 0.68 | 0.32-1.44  | 0.31 | 100 (75.8)  | 32 (24.2)  | 132  | 0.86        | 0.57-1.30        | 0.47         |
| CCP+/CarP-Fib+     | 110 (74.8) | 37 (25.2) | 147 | <b>1.62</b> | <b>1.04-2.53</b> | <b>0.03</b>  | 23 (52.3)  | 21 (47.7)  | 44  | 1.55 | 0.84-2.86  | 0.16 | 198 (77.0)  | 59 (23.0)  | 257  | 0.80        | 0.58-1.10        | 0.17         |
| <b>Any DRB1*16</b> |            |           |     |             |                  |              |            |            |     |      |            |      |             |            |      |             |                  |              |
| Controls           | 454 (98.7) | 6 (1.3)   | 460 | 1.0         | ref.             | -            | 653 (96.9) | 21 (3.1)   | 674 | 1.0  | ref.       | -    | 1184 (97.8) | 27 (2.2)   | 1211 | 1.0         | ref.             | -            |
| CCP-/CarP-Fib-     | 123 (99.2) | 1 (0.8)   | 124 | 0.62        | 0.07-5.16        | 0.65         | 162 (96.4) | 6 (3.6)    | 168 | 1.15 | 0.46-2.90  | 0.76 | 310 (97.8)  | 7 (2.2)    | 317  | 0.99        | 0.43-2.30        | 0.98         |
| CCP-/CarP-Fib+     | 16 (100.0) | 0 (0.0)   | 16  | NA          | NA               | NA           | 12 (100.0) | 0 (0.0)    | 12  | NA   | NA         | NA   | 29 (100.0)  | 0 (0.0)    | 29   | NA          | NA               | NA           |
| CCP+/CarP-Fib-     | 66 (95.7)  | 3 (4.3)   | 69  | 3.44        | 0.84-14.08       | 0.09         | 35 (100.0) | 0 (0.0)    | 35  | NA   | NA         | NA   | 129 (97.7)  | 3 (2.3)    | 132  | 1.02        | 0.31-3.41        | 0.98         |
| CCP+/CarP-Fib+     | 146 (99.3) | 1 (0.7)   | 147 | 0.52        | 0.06-4.34        | 0.54         | 43 (97.7)  | 1 (2.3)    | 44  | 0.72 | 0.10-5.50  | 0.75 | 255 (99.2)  | 2 (0.8)    | 257  | 0.34        | 0.08-1.46        | 0.15         |

**Supplementary Table2b.** RA risk in different subgroups divided by the presence/absence of CarP-FCS and CCP antibodies, in subjects exposed to different HLA alleles compared with non-exposed subjects. Netherlands

| Antibody           | SE Positive stratum |                |         |             |                   |             | SE Negative stratum |                |         |             |                   |              | Overall        |                |         |             |                  |              |
|--------------------|---------------------|----------------|---------|-------------|-------------------|-------------|---------------------|----------------|---------|-------------|-------------------|--------------|----------------|----------------|---------|-------------|------------------|--------------|
|                    | Negative N (%)      | Positive N (%) | N total | OR*         | 95%CI             | p-value     | Negative N (%)      | Positive N (%) | N total | OR*         | 95%CI             | p-value      | Negative N (%) | Positive N (%) | N total | OR*         | 95%CI            | p-value      |
| <b>Any DRB1*01</b> |                     |                |         |             |                   |             |                     |                |         |             |                   |              |                |                |         |             |                  |              |
| Controls           | NA                  | NA             | NA      | NA          | NA                | NA          | NA                  | NA             | NA      | NA          | NA                | NA           | 948 (78.3)     | 263 (21.7)     | 1211    | 1.0         | ref.             | -            |
| CCP-/CarP-FCS-     | NA                  | NA             | NA      | NA          | NA                | NA          | NA                  | NA             | NA      | NA          | NA                | NA           | 209 (74.1)     | 73 (25.9)      | 282     | <b>1.26</b> | <b>0.93-1.70</b> | <b>0.13</b>  |
| CCP-/CarP-FCS+     | NA                  | NA             | NA      | NA          | NA                | NA          | NA                  | NA             | NA      | NA          | NA                | NA           | 42 (80.8)      | 10 (19.2)      | 52      | 0.86        | 0.43-1.73        | 0.67         |
| CCP+/CarP-FCS-     | NA                  | NA             | NA      | NA          | NA                | NA          | NA                  | NA             | NA      | NA          | NA                | NA           | 68 (69.4)      | 30 (30.6)      | 98      | 1.59        | 1.01-2.50        | 0.04         |
| CCP+/CarP-FCS+     | NA                  | NA             | NA      | NA          | NA                | NA          | NA                  | NA             | NA      | NA          | NA                | NA           | 214 (75.6)     | 69 (24.4)      | 283     | <b>1.16</b> | <b>0.86-1.58</b> | <b>0.33</b>  |
| <b>Any DRB1*03</b> |                     |                |         |             |                   |             |                     |                |         |             |                   |              |                |                |         |             |                  |              |
| Controls           | 385 (83.7)          | 75 (16.3)      | 460     | 1.0         | ref.              | -           | 480 (71.2)          | 194 (28.8)     | 674     | 1.0         | ref.              | -            | 941 (77.7)     | 270 (22.3)     | 1211    | 1.0         | ref.             | -            |
| CCP-/CarP-FCS-     | 84 (75.0)           | 28 (25.0)      | 112     | <b>1.71</b> | <b>1.04-2.81</b>  | <b>0.03</b> | 87 (59.2)           | 60 (40.8)      | 147     | <b>1.71</b> | <b>1.18-2.47</b>  | <b>0.005</b> | 193 (68.4)     | 89 (31.6)      | 282     | <b>1.61</b> | <b>1.21-2.14</b> | <b>0.001</b> |
| CCP-/CarP-FCS+     | 14 (66.7)           | 7 (33.3)       | 21      | <b>2.57</b> | <b>1.00-6.57</b>  | <b>0.05</b> | 13 (44.8)           | 16 (55.2)      | 29      | <b>3.04</b> | <b>1.44-6.45</b>  | <b>0.004</b> | 29 (55.8)      | 23 (44.2)      | 52      | <b>2.76</b> | <b>1.57-4.86</b> | <b>0.000</b> |
| CCP+/CarP-FCS-     | 42 (77.8)           | 12 (22.2)      | 54      | 1.47        | 0.74-2.92         | 0.28        | 15 (75.0)           | 5 (25.0)       | 20      | 0.83        | 0.30-2.30         | 0.83         | 81 (82.7)      | 17 (17.3)      | 98      | 0.73        | 0.43-1.26        | 0.26         |
| CCP+/CarP-FCS+     | 126 (80.3)          | 31 (19.7)      | 157     | 1.26        | 0.79-2.01         | 0.32        | 38 (66.7)           | 19 (33.3)      | 57      | 1.24        | 0.70-2.20         | 0.47         | 233 (82.3)     | 50 (17.7)      | 283     | 0.75        | 0.54-1.05        | 0.09         |
| <b>Any DRB1*04</b> |                     |                |         |             |                   |             |                     |                |         |             |                   |              |                |                |         |             |                  |              |
| Controls           | NA                  | NA             | NA      | NA          | NA                | NA          | NA                  | NA             | NA      | NA          | NA                | NA           | 875 (72.3)     | 336 (27.7)     | 1211    | 1.0         | ref.             | -            |
| CCP-/CarP-FCS-     | NA                  | NA             | NA      | NA          | NA                | NA          | NA                  | NA             | NA      | NA          | NA                | NA           | 201 (71.3)     | 81 (28.7)      | 282     | 1.05        | 0.79-1.40        | 0.74         |
| CCP-/CarP-FCS+     | NA                  | NA             | NA      | NA          | NA                | NA          | NA                  | NA             | NA      | NA          | NA                | NA           | 38 (73.1)      | 14 (26.9)      | 52      | 0.96        | 0.51-1.79        | 0.90         |
| CCP+/CarP-FCS-     | NA                  | NA             | NA      | NA          | NA                | NA          | NA                  | NA             | NA      | NA          | NA                | NA           | 44 (44.9)      | 54 (55.1)      | 98      | <b>3.20</b> | <b>2.11-4.85</b> | <b>0.000</b> |
| CCP+/CarP-FCS+     | NA                  | NA             | NA      | NA          | NA                | NA          | NA                  | NA             | NA      | NA          | NA                | NA           | 121 (42.8)     | 162 (57.2)     | 283     | <b>3.49</b> | <b>2.67-4.55</b> | <b>0.000</b> |
| <b>Any DRB1*07</b> |                     |                |         |             |                   |             |                     |                |         |             |                   |              |                |                |         |             |                  |              |
| Controls           | 395 (85.9)          | 65 (14.1)      | 460     | 1.0         | ref.              | -           | 502 (74.5)          | 172 (25.5)     | 674     | 1.0         | ref.              | -            | 973 (80.3)     | 238 (19.7)     | 1211    | 1.0         | ref.             | -            |
| CCP-/CarP-FCS-     | 99 (88.4)           | 13 (11.6)      | 112     | 0.80        | 0.42-1.51         | 0.49        | 111 (75.5)          | 36 (24.5)      | 147     | 0.95        | 0.63-1.43         | 0.80         | 233 (82.6)     | 49 (17.4)      | 282     | 0.86        | 0.61-1.21        | 0.38         |
| CCP-/CarP-FCS+     | 20 (95.2)           | 1 (4.8)        | 21      | 0.30        | 0.04-2.30         | 0.25        | 23 (79.3)           | 6 (20.7)       | 29      | 0.76        | 0.31-1.90         | 0.56         | 45 (86.5)      | 7 (13.5)       | 52      | 0.64        | 0.28-1.43        | 0.27         |
| CCP+/CarP-FCS-     | 46 (85.2)           | 8 (14.8)       | 54      | 1.06        | 0.48-2.34         | 0.89        | 19 (95.0)           | 1 (5.0)        | 20      | 0.15        | 0.02-1.16         | 0.07         | 89 (90.8)      | 9 (9.2)        | 98      | <b>0.41</b> | <b>0.21-0.83</b> | <b>0.013</b> |
| CCP+/CarP-FCS+     | 136 (86.6)          | 21 (13.4)      | 157     | 0.94        | 0.55-1.59         | 0.81        | 39 (68.4)           | 18 (31.6)      | 57      | 1.35        | 0.75-2.42         | 0.32         | 244 (86.2)     | 39 (13.8)      | 283     | <b>0.65</b> | <b>0.45-0.94</b> | <b>0.02</b>  |
| <b>Any DRB1*08</b> |                     |                |         |             |                   |             |                     |                |         |             |                   |              |                |                |         |             |                  |              |
| Controls           | 435 (94.6)          | 25 (5.4)       | 460     | 1.0         | ref.              | -           | 611 (90.7)          | 63 (9.3)       | 674     | 1.0         | ref.              | -            | 1123 (92.7)    | 88 (7.3)       | 1211    | 1.0         | ref.             | -            |
| CCP-/CarP-FCS-     | 110 (98.2)          | 2 (1.8)        | 112     | 0.32        | 0.07-1.36         | 0.12        | 142 (96.6)          | 5 (3.4)        | 147     | <b>0.34</b> | <b>0.14-0.86</b>  | <b>0.02</b>  | 275 (97.5)     | 7 (2.5)        | 282     | <b>0.33</b> | <b>0.15-0.71</b> | <b>0.01</b>  |
| CCP-/CarP-FCS+     | 20 (95.2)           | 1 (4.8)        | 21      | 0.87        | 0.11-6.75         | 0.89        | 27 (93.1)           | 2 (6.9)        | 29      | 0.72        | 0.17-3.09         | 0.66         | 49 (94.2)      | 3 (5.8)        | 52      | 0.78        | 0.24-2.56        | 0.68         |
| CCP+/CarP-FCS-     | 51 (94.4)           | 3 (5.6)        | 54      | 1.02        | 0.30-3.51         | 0.97        | 19 (95.0)           | 1 (5.0)        | 20      | 0.51        | 0.07-3.88         | 0.52         | 94 (95.9)      | 4 (4.1)        | 98      | 0.54        | 0.20-1.51        | 0.24         |
| CCP+/CarP-FCS+     | 153 (97.5)          | 4 (2.5)        | 157     | 0.46        | 0.16-1.33         | 0.15        | 54 (94.7)           | 3 (5.3)        | 57      | 0.54        | 0.16-1.77         | 0.31         | 276 (97.5)     | 7 (2.5)        | 283     | <b>0.32</b> | <b>0.15-0.71</b> | <b>0.01</b>  |
| <b>Any DRB1*09</b> |                     |                |         |             |                   |             |                     |                |         |             |                   |              |                |                |         |             |                  |              |
| Controls           | 454 (98.7)          | 6 (1.3)        | 460     | 1.0         | ref.              | -           | 652 (96.7)          | 22 (3.3)       | 674     | 1.0         | ref.              | -            | 1183 (97.7)    | 28 (2.3)       | 1211    | 1.0         | ref.             | -            |
| CCP-/CarP-FCS-     | 109 (97.3)          | 3 (2.7)        | 112     | 2.08        | 0.51-8.46         | 0.31        | 141 (95.9)          | 6 (4.1)        | 147     | 1.26        | 0.50-3.17         | 0.62         | 273 (96.8)     | 9 (3.2)        | 282     | 1.39        | 0.65-2.99        | 0.39         |
| CCP-/CarP-FCS+     | 21 (100)            | 0              | 21      | NA          | NA                | NA          | 28 (96.6)           | 1 (3.4)        | 29      | 1.06        | 0.14-8.14         | 0.96         | 51 (98.1)      | 1 (1.9)        | 52      | 0.83        | 0.11-6.21        | 0.86         |
| CCP+/CarP-FCS-     | 52 (96.3)           | 2 (3.7)        | 54      | 2.91        | 0.57-14.79        | 0.20        | 18 (90.0)           | 2 (10.0)       | 20      | 3.29        | 0.72-15.01        | 0.13         | 94 (95.9)      | 4 (4.1)        | 98      | 1.80        | 0.62-5.23        | 0.28         |
| CCP+/CarP-FCS+     | 150 (95.5)          | 7 (4.5)        | 157     | <b>3.53</b> | <b>1.17-10.67</b> | <b>0.03</b> | 50 (87.7)           | 7 (12.3)       | 57      | <b>4.15</b> | <b>1.69-10.18</b> | <b>0.002</b> | 268 (94.7)     | 15 (5.3)       | 283     | <b>2.37</b> | <b>1.25-4.49</b> | <b>0.01</b>  |
| <b>Any DRB1*10</b> |                     |                |         |             |                   |             |                     |                |         |             |                   |              |                |                |         |             |                  |              |
| Controls           | NA                  | NA             | NA      | NA          | NA                | NA          | NA                  | NA             | NA      | NA          | NA                | NA           | 1180 (97.4)    | 31 (2.6)       | 1211    | 1.0         | ref.             | -            |
| CCP-/CarP-FCS-     | NA                  | NA             | NA      | NA          | NA                | NA          | NA                  | NA             | NA      | NA          | NA                | NA           | 279 (98.9)     | 3 (1.1)        | 282     | 0.41        | 0.12-1.35        | 0.14         |
| CCP-/CarP-FCS+     | NA                  | NA             | NA      | NA          | NA                | NA          | NA                  | NA             | NA      | NA          | NA                | NA           | 51 (91.8)      | 1 (1.9)        | 52      | 0.75        | 0.10-5.58        | 0.78         |
| CCP+/CarP-FCS-     | NA                  | NA             | NA      | NA          | NA                | NA          | NA                  | NA             | NA      | NA          | NA                | NA           | 90 (91.8)      | 8 (8.2)        | 98      | <b>3.38</b> | <b>1.51-7.58</b> | <b>0.003</b> |

| CCP+/CarP-FCS+     | NA         | NA        | NA  | NA          | NA                | NA           | NA         | NA         | NA  | NA   | NA        | NA   | 253 (89.4)  | 30 (10.6)  | 283  | 4.51        | 2.68-7.59        | 0.000        |
|--------------------|------------|-----------|-----|-------------|-------------------|--------------|------------|------------|-----|------|-----------|------|-------------|------------|------|-------------|------------------|--------------|
| <b>Any DRB1*11</b> |            |           |     |             |                   |              |            |            |     |      |           |      |             |            |      |             |                  |              |
| Controls           | 390 (84.8) | 70 (15.2) | 460 | 1.0         | ref.              | -            | 532 (78.9) | 142 (21.1) | 674 | 1.0  | ref.      | -    | 999 (82.5)  | 212 (17.5) | 1211 | 1.0         | ref.             | -            |
| CCP-/CarP-FCS-     | 103 (92.0) | 9 (8.0)   | 112 | <b>0.49</b> | <b>0.24-1.01</b>  | <b>0.05</b>  | 111 (75.5) | 36 (24.5)  | 147 | 1.22 | 0.80-1.85 | 0.36 | 237 (84.0)  | 45 (16.0)  | 282  | 0.90        | 0.63-1.27        | 0.54         |
| CCP-/CarP-FCS+     | 17 (81.0)  | 4 (19.0)  | 21  | 1.31        | 0.43-4.01         | 0.64         | 22 (75.9)  | 7 (24.1)   | 29  | 1.19 | 0.50-2.85 | 0.69 | 41 (78.8)   | 11 (21.2)  | 52   | 1.26        | 0.64-2.50        | 0.50         |
| CCP+/CarP-FCS-     | 48 (88.9)  | 6 (11.1)  | 54  | 0.70        | 0.29-1.69         | 0.42         | 14 (70.0)  | 6 (30.0)   | 20  | 1.61 | 0.61-4.25 | 0.34 | 86 (87.8)   | 12 (12.2)  | 98   | 0.66        | 0.35-1.23        | 0.19         |
| CCP+/CarP-FCS+     | 138 (87.9) | 19 (12.1) | 157 | 0.77        | 0.45-1.32         | 0.34         | 44 (77.2)  | 13 (22.8)  | 57  | 1.11 | 0.58-2.11 | 0.76 | 251 (88.7)  | 32 (11.3)  | 283  | <b>0.60</b> | <b>0.40-0.89</b> | <b>0.012</b> |
| <b>Any DRB1*12</b> |            |           |     |             |                   |              |            |            |     |      |           |      |             |            |      |             |                  |              |
| Controls           | 444 (96.5) | 16 (3.5)  | 460 | 1.0         | ref.              | -            | 634 (94.1) | 40 (5.9)   | 674 | 1.0  | ref.      | -    | 1154 (95.3) | 57 (4.7)   | 1211 | 1.0         | ref.             | -            |
| CCP-/CarP-FCS-     | 109 (97.3) | 3 (2.7)   | 112 | 0.76        | 0.22-2.67         | 0.67         | 133 (90.5) | 14 (9.5)   | 147 | 1.67 | 0.88-3.15 | 0.12 | 265 (94.0)  | 17 (6.0)   | 282  | 1.30        | 0.74-2.27        | 0.36         |
| CCP-/CarP-FCS+     | 21 (100)   | 0         | 21  | NA          | NA                | NA           | 28 (96.6)  | 1 (3.4)    | 29  | 0.57 | 0.08-4.27 | 0.58 | 51 (98.1)   | 1 (1.9)    | 52   | 0.40        | 0.05-2.92        | 0.37         |
| CCP+/CarP-FCS-     | 53 (98.1)  | 1 (1.9)   | 54  | 0.52        | 0.07-4.03         | 0.53         | 18 (90.0)  | 2 (10.0)   | 20  | 1.76 | 0.40-7.86 | 0.46 | 95 (96.9)   | 3 (3.1)    | 98   | 0.64        | 0.20-2.08        | 0.46         |
| CCP+/CarP-FCS+     | 153 (97.5) | 4 (2.5)   | 157 | 0.73        | 0.24-2.20         | 0.57         | 55 (96.5)  | 2 (3.5)    | 57  | 0.58 | 0.14-2.45 | 0.46 | 277 (97.9)  | 6 (2.1)    | 283  | 0.44        | 0.19-1.03        | 0.06         |
| <b>Any DRB1*13</b> |            |           |     |             |                   |              |            |            |     |      |           |      |             |            |      |             |                  |              |
| Controls           | 372 (80.9) | 88 (19.1) | 460 | 1.0         | ref.              | -            | 442 (65.6) | 232 (34.4) | 674 | 1.0  | ref.      | -    | 891 (73.6)  | 320 (26.4) | 1211 | 1.0         | ref.             | -            |
| CCP-/CarP-FCS-     | 90 (80.4)  | 22 (19.6) | 112 | 1.03        | 0.61-1.74         | 0.90         | 101 (68.7) | 46 (31.3)  | 147 | 0.87 | 0.59-1.27 | 0.47 | 213 (75.5)  | 69 (24.5)  | 282  | 0.90        | 0.67-1.22        | 0.50         |
| CCP-/CarP-FCS+     | 17 (81.0)  | 4 (19.0)  | 21  | 1.00        | 0.33-3.03         | 0.99         | 20 (69.0)  | 9 (31.0)   | 29  | 0.86 | 0.38-1.91 | 0.71 | 39 (75.0)   | 13 (25.0)  | 52   | 0.93        | 0.49-1.76        | 0.82         |
| CCP+/CarP-FCS-     | 47 (87.0)  | 7 (13.0)  | 54  | 0.63        | 0.28-1.44         | 0.27         | 14 (70.0)  | 6 (30.0)   | 20  | 0.82 | 0.31-2.15 | 0.68 | 85 (86.7)   | 13 (13.3)  | 98   | <b>0.43</b> | <b>0.23-0.77</b> | <b>0.01</b>  |
| CCP+/CarP-FCS+     | 143 (91.1) | 14 (8.9)  | 157 | <b>0.41</b> | <b>0.23-0.75</b>  | <b>0.004</b> | 44 (77.2)  | 13 (22.8)  | 57  | 0.56 | 0.30-1.07 | 0.08 | 255 (90.1)  | 28 (9.9)   | 283  | <b>0.31</b> | <b>0.20-0.46</b> | <b>0.000</b> |
| <b>Any DRB1*14</b> |            |           |     |             |                   |              |            |            |     |      |           |      |             |            |      |             |                  |              |
| Controls           | 438 (95.2) | 22 (4.8)  | 460 | 1.0         | ref.              | -            | 613 (90.9) | 61 (9.1)   | 674 | 1.0  | ref.      | -    | 1128 (93.1) | 83 (6.9)   | 1211 | 1.0         | ref.             | -            |
| CCP-/CarP-FCS-     | 107 (95.5) | 5 (4.5)   | 112 | 0.93        | 0.34-2.51         | 0.89         | 140 (95.2) | 7 (4.8)    | 147 | 0.50 | 0.23-1.12 | 0.09 | 270 (95.7)  | 12 (4.3)   | 282  | 0.60        | 0.33-1.12        | 0.11         |
| CCP-/CarP-FCS+     | 19 (90.5)  | 2 (9.5)   | 21  | 2.10        | 0.46-9.57         | 0.34         | 26 (89.7)  | 3 (9.3)    | 29  | 1.16 | 0.34-3.94 | 0.81 | 47 (90.4)   | 5 (9.6)    | 52   | 1.45        | 0.56-3.73        | 0.45         |
| CCP+/CarP-FCS-     | 53 (98.1)  | 1 (1.9)   | 54  | 0.38        | 0.05-2.84         | 0.34         | 17 (85.0)  | 3 (15.0)   | 20  | 1.77 | 0.51-6.22 | 0.37 | 94 (95.9)   | 4 (4.1)    | 98   | 0.58        | 0.21-1.61        | 0.30         |
| CCP+/CarP-FCS+     | 148 (94.3) | 9 (5.7)   | 157 | 1.21        | 0.55-2.69         | 0.64         | 56 (98.2)  | 1 (1.8)    | 57  | 0.18 | 0.02-1.32 | 0.09 | 273 (96.5)  | 10 (3.5)   | 283  | <b>0.50</b> | <b>0.26-0.97</b> | <b>0.04</b>  |
| <b>Any DRB1*15</b> |            |           |     |             |                   |              |            |            |     |      |           |      |             |            |      |             |                  |              |
| Controls           | 381 (82.8) | 79 (17.2) | 460 | 1.0         | ref.              | -            | 424 (62.9) | 250 (37.1) | 674 | 1.0  | ref.      | -    | 882 (72.8)  | 329 (27.2) | 1211 | 1.0         | ref.             | -            |
| CCP-/CarP-FCS-     | 88 (78.6)  | 24 (21.4) | 112 | 1.32        | 0.79-2.20         | 0.29         | 97 (66.0)  | 50 (34.0)  | 147 | 0.87 | 0.60-1.27 | 0.48 | 208 (73.8)  | 74 (26.2)  | 282  | 0.95        | 0.71-1.28        | 0.75         |
| CCP-/CarP-FCS+     | 20 (95.2)  | 1 (4.8)   | 21  | 0.24        | 0.03-1.82         | 0.17         | 23 (79.3)  | 6 (20.7)   | 29  | 0.44 | 0.18-1.10 | 0.08 | 45 (86.5)   | 7 (13.5)   | 52   | <b>0.42</b> | <b>0.19-0.93</b> | <b>0.03</b>  |
| CCP+/CarP-FCS-     | 44 (81.5)  | 10 (18.5) | 54  | 1.10        | 0.53-2.27         | 0.81         | 10 (50.0)  | 10 (50.0)  | 20  | 1.70 | 0.70-4.13 | 0.25 | 78 (79.6)   | 20 (20.4)  | 98   | 0.69        | 0.41-1.14        | 0.15         |
| CCP+/CarP-FCS+     | 112 (71.3) | 45 (28.7) | 157 | <b>1.94</b> | <b>1.27-2.96</b>  | <b>0.002</b> | 37 (65.0)  | 20 (35.0)  | 57  | 0.92 | 0.52-1.62 | 0.76 | 216 (76.3)  | 67 (23.7)  | 283  | 0.83        | 0.62-1.13        | 0.23         |
| <b>Any DRB1*16</b> |            |           |     |             |                   |              |            |            |     |      |           |      |             |            |      |             |                  |              |
| Controls           | 454 (98.7) | 6 (1.3)   | 460 | 1.0         | ref.              | -            | 653 (96.9) | 21 (3.1)   | 674 | 1.0  | ref.      | -    | 1184 (97.8) | 27 (2.2)   | 1211 | 1.0         | ref.             | -            |
| CCP-/CarP-FCS-     | 111 (99.1) | 1 (0.9)   | 112 | 0.68        | 0.08-5.72         | 0.72         | 142 (96.6) | 5 (3.4)    | 147 | 1.19 | 0.41-2.95 | 0.86 | 276 (97.9)  | 6 (2.1)    | 282  | 0.95        | 0.39-2.33        | 0.92         |
| CCP-/CarP-FCS+     | 21 (100)   | 0         | 21  | NA          | NA                | NA           | 28 (96.6)  | 1 (3.4)    | 29  | 1.18 | 0.14-8.55 | 0.92 | 51 (98.1)   | 1 (1.9)    | 52   | 0.86        | 0.12-6.45        | 0.88         |
| CCP+/CarP-FCS-     | 51 (94.4)  | 3 (5.6)   | 54  | <b>4.45</b> | <b>1.08-18.34</b> | <b>0.04</b>  | 20 (100)   | 0          | 20  | NA   | NA        | NA   | 95 (96.9)   | 3 (3.1)    | 98   | 1.39        | 0.41-4.65        | 0.60         |
| CCP+/CarP-FCS+     | 156 (99.4) | 1 (0.6)   | 157 | 0.49        | 0.06-4.06         | 0.51         | 56 (98.2)  | 1 (1.8)    | 57  | 0.71 | 0.07-4.21 | 0.57 | 281 (99.3)  | 2 (0.7)    | 283  | 0.31        | 0.07-1.32        | 0.11         |



**Supplementary Table3.** Association analysis for disease risk in different RA subgroups divided by the presence/absence of anti-CarP-FCS and anti-CCP antibodies, in subjects exposed to any *HLA-DRB1-03* alleles compared with non-exposed subjects, stratified by shared epitope status.

| Group                      | Shared epitope positive stratum |           |             |                  |              |                                 | Shared epitope negative stratum |            |             |                  |              |                                 |
|----------------------------|---------------------------------|-----------|-------------|------------------|--------------|---------------------------------|---------------------------------|------------|-------------|------------------|--------------|---------------------------------|
|                            | Any DRB1*03                     |           | OR*         | 95%CI            | p-value      | p-value for comparing two ORs** | Any DRB1*03                     |            | OR*         | 95%CI            | p-value      | p-value for comparing two ORs** |
|                            | None N (%)                      | Any N (%) |             |                  |              |                                 | None N (%)                      | Any N (%)  |             |                  |              |                                 |
| <b>Leiden EAC cohort</b>   |                                 |           |             |                  |              |                                 |                                 |            |             |                  |              |                                 |
| Controls                   | 385 (83.7)                      | 75 (16.3) | 1.0         | ref.             | -            |                                 | 480 (71.2)                      | 194 (28.8) | 1.0         | ref.             | -            |                                 |
| CCP-/CarP-FCS-             | 84 (75.0)                       | 28 (25.0) | <b>1.71</b> | <b>1.04-2.81</b> | <b>0.030</b> | 1.71 vs. 2.57,                  | 87 (59.2)                       | 60 (40.8)  | <b>1.71</b> | <b>1.18-2.47</b> | <b>0.005</b> | 1.71 vs. 3.04,                  |
| CCP-/CarP-FCS+             | 14 (66.7)                       | 7 (33.3)  | <b>2.57</b> | <b>1.00-6.57</b> | <b>0.050</b> | p=0.43                          | 13 (44.8)                       | 16 (55.2)  | <b>3.04</b> | <b>1.44-6.45</b> | <b>0.004</b> | p=0.15                          |
| CCP+/CarP-FCS-             | 42 (77.8)                       | 12 (22.2) | 1.47        | 0.74-2.92        | 0.28         | 1.47 vs. 1.26,                  | 15 (75.0)                       | 5 (25.0)   | 0.83        | 0.30-2.30        | 0.83         | 0.83 vs. 1.24,                  |
| CCP+/CarP-FCS+             | 126 (80.3)                      | 31 (19.7) | 1.26        | 0.79-2.01        | 0.32         | p=0.70                          | 38 (66.7)                       | 19 (33.3)  | 1.24        | 0.70-2.20        | 0.47         | p=0.49                          |
| <b>Swedish EIRA cohort</b> |                                 |           |             |                  |              |                                 |                                 |            |             |                  |              |                                 |
| Controls                   | 318 (83.0)                      | 65(17.0)  | 1.0         | ref.             | -            |                                 | 338 (67.2)                      | 165 (32.8) | 1.0         | ref.             | -            |                                 |
| CCP-/CarP-FCS-             | 166 (78.3)                      | 46 (21.7) | 1.32        | 0.85-2.04        | 0.22         | 1.32 vs. 2.69,                  | 128 (60.4)                      | 84 (39.6)  | 1.28        | 0.91-1.81        | 0.16         | 1.28 vs. 1.95,                  |
| CCP-/CarP-FCS+             | 18 (66.7)                       | 9 (33.3)  | <b>2.69</b> | <b>1.07-6.72</b> | <b>0.035</b> | p=0.17                          | 15 (53.6)                       | 13 (46.4)  | 1.95        | 0.88-4.35        | 0.10         | p=0.35                          |
| CCP+/CarP-FCS-             | 195 (81.3)                      | 45 (18.7) | 1.17        | 0.75-1.81        | 0.50         | 1.17 vs. 1.31,                  | 48 (61.5)                       | 30 (38.5)  | 1.33        | 0.80-2.22        | 0.28         | 1.33 vs. 0.84,                  |
| CCP+/CarP-FCS+             | 158 (81.0)                      | 37 (19.0) | 1.31        | 0.82-2.09        | 0.26         | p=0.88                          | 35 (70.0)                       | 15 (30.0)  | 0.84        | 0.43-1.63        | 0.60         | p=0.23                          |
| <b>Meta-analysis</b>       |                                 |           |             |                  |              |                                 |                                 |            |             |                  |              |                                 |
| Controls                   | 703                             | 140       | 1.0         | ref.             | -            |                                 | 818                             | 359        | 1.0         | ref.             | -            |                                 |
| CCP-/CarP-FCS-             | 250                             | 74        | <b>1.48</b> | <b>1.06-2.05</b> | <b>0.020</b> | 1.48 vs. 2.63,                  | 215                             | 144        | <b>1.47</b> | <b>1.11-1.95</b> | <b>0.008</b> | 1.47 vs. 2.47,                  |
| CCP-/CarP-FCS+             | 32                              | 16        | <b>2.63</b> | <b>1.36-5.08</b> | <b>0.004</b> | p=0.11                          | 28                              | 29         | <b>2.47</b> | <b>1.43-4.27</b> | <b>0.001</b> | p=0.13                          |
| CCP+/CarP-FCS-             | 237                             | 57        | 1.25        | 0.86-1.81        | 0.24         | 1.25 vs. 1.29,                  | 63                              | 35         | 1.21        | 0.77-1.90        | 0.41         | 1.21 vs. 1.05,                  |
| CCP+/CarP-FCS+             | 284                             | 68        | 1.29        | 0.92-1.79        | 0.14         | p=0.98                          | 73                              | 34         | 1.05        | 0.68-1.62        | 0.82         | p=0.55                          |

\*: Odds ratios in Sweden cohort adjusted for age, gender and residential areas. \*\*: Odds ratios of CCP-/CarP-FCS+ RA subsets were compared with odds ratios of CCP-/CarP-FCS- RA subsets; Odds ratios of CCP+/CarP-FCS+ RA subsets were compared with odds ratios of CCP+/CarP-FCS- RA subsets.
